# **The oncoprotein DEK affects the outcome of PARP1/2 inhibition during replication stress**

Magdalena Ganz<sup>1¶</sup>, Christopher Vogel<sup>1¶</sup>, Christina Czada<sup>1</sup>, Vera Jörke<sup>1</sup>, Rebecca Kleiner<sup>1</sup>, Agnieszka Pierzynska-Mach<sup>2,3</sup>, Francesca Cella Zancchi<sup>2,4</sup>, Alberto Diaspro<sup>2,5</sup>, Ferdinand Kappes<sup>6</sup>, Alexander Bürkle<sup>7</sup>, and Elisa Ferrando-May<sup>1\*</sup>

<sup>1</sup>Department of Biology, Bioimaging Center, University of Konstanz, Konstanz, Germany

<sup>2</sup>Nanoscopy and NIC@IIT, Istituto Italiano di Tecnologia, Genoa, Italy

<sup>3</sup>Department of Experimental Oncology, European Institute of Oncology, Milan, Italy

<sup>4</sup>Biophysics Institute (IBF), National Research Council (CNR), Genoa, Italy

<sup>5</sup>DIFILAB, Department of Physics, University of Genoa, Genoa, Italy

<sup>6</sup>Xi'an Jiaotong-Liverpool University, Dushu Lake Higher Education Town, Suzhou, China

<sup>7</sup>Department of Biology, Molecular Toxicology Group, University of Konstanz, Konstanz, Germany

Short title: DEK and PARP in replication stress

\* Corresponding author

email: [elisa.may@uni-konstanz.de](mailto:elisa.may@uni-konstanz.de)

<sup>¶</sup>These authors contributed equally to this work

## 23 **ABSTRACT**

24 DNA replication stress is a major source of genomic instability and is closely linked to  
25 tumor formation and progression. Poly(ADP-ribose)polymerases1/2 (PARP1/2)  
26 enzymes are activated in response to replication stress resulting in poly(ADP-ribose)  
27 (PAR) synthesis. PARylation plays an important role in the remodelling and repair of  
28 impaired replication forks, providing a rationale for targeting highly replicative cancer  
29 cells with PARP1/2 inhibitors. The human oncoprotein DEK is a unique, non-histone  
30 chromatin architectural protein whose deregulated expression is associated with the  
31 development of a wide variety of human cancers. Recently, we showed that DEK is a  
32 high-affinity target of PARylation and that it promotes the progression of impaired  
33 replication forks. Here, we investigated a potential functional link between PAR and  
34 DEK in the context of replication stress. Under conditions of mild replication stress  
35 induced either by topoisomerase1 inhibition with camptothecin or nucleotide depletion  
36 by hydroxyurea, we found that the effect of acute PARP1/2 inhibition on replication  
37 fork progression is dependent on DEK expression. Reducing DEK protein levels also  
38 overcomes the restart impairment of stalled forks provoked by blocking PARylation.  
39 Non-covalent DEK-PAR interaction via the central PAR-binding domain of DEK is  
40 crucial for counteracting PARP1/2 inhibition as shown for the formation of RPA positive  
41 foci in hydroxyurea treated cells. Finally, we show by iPOND and super resolved  
42 microscopy that DEK is not directly associated with the replisome since it binds to DNA  
43 at the stage of chromatin formation. Our report sheds new light on the still enigmatic  
44 molecular functions of DEK and suggests that DEK expression levels may influence  
45 the sensitivity of cancer cells to PARP1/2 inhibitors.

46

## 47 INTRODUCTION

48 Poly(ADP-ribosyl)ation (PARylation) is an abundant protein posttranslational  
49 modification regulating numerous cellular functions among which the maintenance of  
50 genomic stability plays a prominent role [1]. The enzyme responsible for 85-90% of  
51 the cellular PAR synthesis activity is PARP1, with PARP2 accounting for the remainder  
52 [2]. PAR can be covalently linked to and/or interact non-covalently with target proteins.  
53 PARylation is highly dynamic and can be very transient in nature due to the activity of  
54 the de-modifying enzyme, the PAR glycohydrolase or PARG [3]. Inhibition of  
55 PARylation by small molecule compounds is a recently approved strategy for the  
56 treatment of ovarian cancer [4]. The rationale for the use of PARP1/2 inhibitors in  
57 chemotherapy is based on their synthetic lethal interaction with DNA damaging agents  
58 in cells which are deficient for recombinational DNA repair through mutations in  
59 BRCA1/2 [5, 6]. In these cells, inhibition of PARylation abrogates base excision repair  
60 thereby turning endogenous single strand breaks (SSBs) in highly toxic, non-  
61 repairable double strand breaks (DSBs). In addition, PARP1/2 inhibitors possess DNA  
62 trapping activity which causes DSBs on its own due to the collision of PARP-DNA  
63 complexes with the DNA replication and transcription machineries [7]. Impaired DNA  
64 replication has recently come into the focus as a further source of DNA lesions which  
65 can become lethal to cells treated with PARP1/2 inhibitors. If not removed timely,  
66 replication blocks lead to fork collapse leaving behind single ended DNA strand breaks  
67 as well as SSBs which require PARylation for their prompt repair. PARP1/2 was also  
68 shown to be directly involved in replication fork stabilization and protection. Thus,  
69 PARP is required for the restart of collapsed forks after prolonged exposure to  
70 hydroxyurea (HU) [8], protects transiently stalled forks from premature and extensive

71 resection [9] and regulates fork reversal induced e.g. by low doses of camptothecin  
72 (CPT). More precisely, PARylation prevents RecQ helicase from resolving regressed  
73 forks prematurely, thus avoiding fork run off across DNA lesions and DSB generation  
74 [10, 11]. Finally, PARP1/2 was shown to play an important role also during  
75 unperturbed DNA replication. Using pharmacological PARG inhibition to stabilize and  
76 detect basal PAR levels, the polymer was shown to be required for sensing and  
77 repairing a sub-set of unligated Okazaki fragments thus providing a back-up pathway  
78 for the completion of lagging strand DNA synthesis [12].

79 DEK is a non-histone chromatin protein which is ubiquitously present in higher  
80 eukaryotes [13]. Its binding to DNA is regulated by abundant post-translational  
81 modifications, including phosphorylation [14, 15], acetylation [16, 17], and PARylation  
82 [18-20]. Covalent PARylation of DEK is efficiently triggered by DNA damage leading  
83 to the loss of its DNA binding and folding activities [20]. The DEK amino acid sequence  
84 bears three PAR-binding motifs which mediate non-covalent PAR interaction *in vitro*,  
85 thereby moderately reducing DNA binding but incrementing DEK multimerization [18].  
86 A continuously increasing number of studies link DEK overexpression to cancer  
87 development, pinpointing DEK as a “bona fide” oncogene [21]. DEK is considered a  
88 potential therapeutic target and a biomarker for breast and ovarian cancer [22-24],  
89 retinoblastoma [25], colorectal [26] and bladder cancer [27] as well as for melanoma  
90 progression [28, 29]. DEK has a pleiotropic mode of action and can influence diverse  
91 regulatory circuits in the cell, a notion supported also by the recent elucidation of its  
92 interactome [30]. Downregulation of DEK expression increases the susceptibility to  
93 DNA damage [20, 31], attenuates apoptosis [32] and senescence [21], and affects  
94 proliferation and chemoresistance [23, 33, 34]. On the mechanistic level, DEK is  
95 known to have DNA folding activity, principally via its ability to introduce positive

96 supercoils [35-37]. Thus, DEK has been involved in splicing [38], transcriptional  
97 activation and repression, heterochromatin stability [39], DNA repair [40, 41] and DNA  
98 replication [42, 43]. Concerning the latter, we recently proposed that DEK acts as a  
99 tumour promoter by protecting cells from the deleterious consequences of DNA  
100 replication stress. In particular, we showed that DEK facilitates replication fork  
101 progression under stress, and counteracts DNA damage arising from impeded  
102 replication as well as its transmission to daughter cells [43]. In this study, we set out  
103 to examine a potential functional link between DEK and PARP1/2 in the context of  
104 DNA replication stress. Our data reveal that for mildly stressed replication forks, the  
105 consequences of PARP1/2 inhibition depend on DEK expression.

106

## 107 **MATERIAL AND METHODS**

### 108 **Cell culture**

109 U2-OS osteosarcoma cells were cultured in McCoy's 5a modified medium (Thermo  
110 Fisher Scientific) supplemented with 10 % fetal bovine serum (FCS; Capricorn  
111 Scientific and PAA Laboratories), 100 U/ml penicillin and 100 µg/ml streptomycin (both  
112 Thermo Fisher Scientific). U2-OS control and shDEK cells [43] were additionally  
113 supplemented with 2 µg/ml puromycin (Merck). Puromycin was omitted 36 h prior to  
114 experiments. U2-OS shDEK cells stably express an shRNA targeting the human DEK  
115 transcript, resulting in a permanent reduction of DEK protein levels of around 90 %  
116 [43]. U2-OS wildtype cells were a kind gift of G. Marra, University of Zurich,  
117 Switzerland. To generate U2-OS GFP-DEK cells, the eGFP sequence has been  
118 inserted at the 5' end of the endogenous DEK coding sequence in wildtype cells via  
119 TALEN-mediated genome editing (Vogel et al., in preparation). HeLa S3 cervical

120 adenocarcinoma cells were cultured in DMEM medium (Thermo Fisher Scientific)  
121 supplemented with 10 % fetal bovine serum, 100 U/ml penicillin, 100 µg/ml  
122 streptomycin and 6 mM L-glutamine (Thermo Fisher Scientific). BJ-5ta foreskin  
123 fibroblasts were cultured in a 4:1 mixture of DMEM medium and Medium 199 medium  
124 (Thermo Fisher Scientific) supplemented with 10 % fetal bovine serum, 4 mM L-  
125 glutamine and 10 µg/ml hygromycin B (Merck).

126 For induction of replication stress, cells were treated with hydroxyurea (HU; Merck)  
127 or camptothecin (CPT; Merck) as indicated. PARP1/2 activity was inhibited with ABT-  
128 888 or AZD-2281 (both Selleckchem) as indicated.

129

### 130 **Isolation of Proteins on Nascent DNA (iPOND)**

131 iPOND was performed as described by Sirbu et al. [44], with minor modifications. At  
132 least  $1 \times 10^8$  HeLa S3 cells per sample were pulsed with 10 µM EdU (Thermo Fisher  
133 Scientific) for the indicated times and either incubated with 10 µM thymidine (Merck)  
134 for 0 - 30 min before fixation (chase experiments) or fixated immediately (pulse  
135 experiments). For replication stress experiments thymidine containing medium was  
136 supplemented with 2 mM HU and/or 1 µM ABT-888. Click reaction to label EdU-  
137 containing DNA was performed using biotin-PEG3-azide (Jena Bioscience) for 90 min  
138 and cells were sonicated in a Bioruptor sonicator (Diogenode) to solubilize chromatin  
139 fragments. Biotin-linked fragments were precipitated overnight at 4 °C using  
140 streptavidin-coupled magnetic beads (0.8 µm, Solulink). Chromatin bound proteins  
141 ("Capture") were subjected to Western blot analysis using the following antibodies:  
142 polyclonal rabbit α-DEK K-877 (1:20,000; [20]), monoclonal mouse α-PCNA (1:9,000;  
143 PC10, Cell Signaling Technology), polyclonal rabbit α-H3 (1:150,000; ab1791, Abcam).

144

145 **DNA fiber assay**

146 For the determination of tract length ratios, U2-OS shDEK and control cells were  
147 labelled with 60  $\mu$ M CldU (Merck) for 20 min and subsequently treated with 250  $\mu$ M  
148 IdU (Merck) for 20 min in the presence or absence of 25 mM CPT and/or 1  $\mu$ M ABT-  
149 888 as indicated. For the analysis of replication fork restart, cells were labelled with 60  
150  $\mu$ M CldU for 20 min and subsequently treated with 4 mM HU and 60  $\mu$ M CldU for 4 h.  
151 After washing, cells were labelled with 250  $\mu$ M IdU for 20 min in the presence or  
152 absence of 1  $\mu$ M ABT-888.

153 DNA fiber spreads were prepared as described by Merrick et al. [45] with  
154 modifications: After trypsination and resuspension in ice-cold PBS, labelled and  
155 unlabelled cells were mixed in a 1:5 ratio. 12.5  $\mu$ l of the mixture were diluted with 7.5  
156  $\mu$ l lysis buffer (200 mM Tris-HCl pH 7.4, 50 mM EDTA, 0.5 % SDS) on a glass slide.  
157 After 9 min the slides were tilted at 30-45° and the resulting DNA spreads were air-  
158 dried and fixed overnight in a methanol:acetic acid mixture (3:1) at 4 °C. Following  
159 denaturing and blocking with 2 % BSA in 0.1 % Tween 20, the slides were incubated  
160 for 2.5 h with rat  $\alpha$ -BrdU (1:200; BU1/75 (ICR1), Abcam; detects CldU) and mouse  $\alpha$ -  
161 BrdU (1:200; B44 from BD Biosciences; detects IdU) antibodies. Fibers were treated  
162 with goat  $\alpha$ -mouse AlexaFluor-488 and goat  $\alpha$ -rat AlexaFluor-546 (both Thermo Fisher  
163 Scientific) secondary antibodies for 1h at RT, allowed to air-dry and mounted in  
164 ProLong Gold Antifade (Thermo Fisher Scientific). Widefield microscopy was  
165 performed with a Zeiss Axio Observer Z1 equipped with a Plan Apochromat 63x/1.40  
166 oil DIC objective lens. Data were evaluated using Fiji v1.49u (National Institutes of  
167 Health, MD [46]) and the fiber tool of the BIC macro tool box [43].

168

169

## 170 **Selection of DEK-GFP expressing cells**

171 U2-OS shDEK cells were transfected with plasmids encoding DEK WT-GFP or DEK  
172 PBD2-Mut2-GFP. After 24 h, cells were sorted using a FACSAria IIIu (BD Biosciences).  
173 Low DEK GFP expressing cells were collected in McCoy's 5a modified medium  
174 supplemented with 20 % FCS. To determine expression levels of endogenous and  
175 ectopic DEK, total proteins were extracted with SDS lysis buffer. Cleared lysates were  
176 subjected to Western blotting with the following antibodies: polyclonal rabbit  $\alpha$ -DEK K-  
177 877 (1:20,000; [20]), polyclonal rabbit  $\alpha$ -PCNA (1:5,000; ab18197, Abcam).

178

## 179 **Immunofluorescence**

180 For immunofluorescence detection of Rad51, U2-OS cells were preextracted using  
181 CSK-buffer (10 mM Hepes-KOH pH 7.4, 300 mM sucrose, 100 mM NaCl, 3 mM MgCl<sub>2</sub>,  
182 0.5 % Triton X-100, 10 mM NaF, 1 mM NaVO<sub>3</sub>, 11.5 mM Na-molybdat) for 5 min on  
183 ice after treatment and fixed using 4 % PFA/PBS supplemented with 10 mM NaF and  
184 1 mM NaVO<sub>3</sub> (20 min, RT). For immunofluorescence detection of 53BP1,  $\gamma$ H2AX and  
185 RPA70, cells were fixed with 4 % PFA/PBS without preextraction. After  
186 permeabilization, cells were incubated with primary antibodies diluted in 1 % BSA/PBS  
187 (Rad51, 53BP1,  $\gamma$ H2AX) or 10 % FBS/0.05 % Na-azide/culture medium (RPA70)  
188 overnight at 4 °C. The following primary antibodies were used: polyclonal rabbit  $\alpha$ -  
189 53BP1 (1:200; H-300, Santa Cruz), monoclonal rabbit  $\alpha$ -RPA70 (1:1000; ab79398,  
190 Abcam), monoclonal mouse  $\alpha$ - $\gamma$ H2AX (1:500; Ser139, clone JBW301, Santa Cruz),  
191 polyclonal rabbit  $\alpha$ -Rad51 (1:100; H-92, Santa Cruz). After washing with PBS, cells  
192 were incubated with secondary antibodies diluted in 1 % BSA/PBS at RT for 1 h. The  
193 following secondary antibodies were used: goat  $\alpha$ -mouse AlexaFluor-488, goat  $\alpha$ -



194 rabbit AlexaFluor-546 (both 1:400; both Thermo Fisher Scientific). For nuclear  
195 counterstaining, cells were incubated in 200 ng/μl Hoechst 33342/PBS (Merck).  
196 Coverslips were mounted on microscopy slides using Aqua Polymount (Polysciences).  
197 Replicating cells were visualized by labelling with 10 μM EdU 10 min prior to replication  
198 stress induction. Cells were fixed and immunostainings performed as described above.  
199 After incubation with secondary antibodies, EdU was detected using the Klick-it EdU  
200 Imaging Kit with AlexaFluor-488 or -647 azide (all Thermo Fisher Scientific) following  
201 manufacturer's instructions. Nuclear counterstaining and mounting of coverslips was  
202 performed as described above.

203

## 204 **Confocal and superresolution microscopy**

205 Confocal microscopy was performed with a Zeiss LSM 510 Meta and a Zeiss LSM  
206 780 equipped with a Plan Neofluar 40x/1.30 oil or a Plan Apochromat 40x/1.40 oil  
207 objective lens, respectively. Image analysis was done with Fiji v1.49u [46] using the  
208 ImageJ BIC macro tool box [43]. For counting DNA damage foci, appropriate noise  
209 parameters for each channel were determined manually and applied to all samples  
210 within one experiment. For the determination of the number of cells positive for lesion  
211 markers, the lower threshold for the number of foci per nucleus was set such to include  
212 95 % of untreated control cells. The threshold was applied to all samples within one  
213 experiment. Cells exceeding the threshold were classified as positive for the  
214 respective lesion marker.

215 To test the efficiency of PARP inhibitor ABT-888, cells were left untreated or pre-  
216 treated with 1 μM ABT-888 for increasing time points, followed by DNA damage  
217 induction using 800 μM H<sub>2</sub>O<sub>2</sub> (Merck) for 10 min. Detection of PAR was achieved after  
218 fixation with methanol:acetic acid (3:1) using a monoclonal mouse α-PAR antibody

219 (10H, 1:300 in PBSMT (5 % milk powder, 0.05 % Tween 20, PBS) at 4 °C overnight.  
220 Confocal microscopy was performed with a Zeiss LSM 510 Meta as described above.  
221 PAR nuclear intensities were analysed using Fiji v1.49u.

222 For superresolution imaging by 3D structured illumination (SI), U2-OS GFP-DEK  
223 cells were grown on high precision coverslips (# 1.5). Replication foci were labelled  
224 via incubation with 10 µM EdU for 10 min prior fixation. For immunofluorescence  
225 detection of PCNA, cells were fixed using 4 % PFA/PBS (10 min) and permeabilized  
226 in methanol (5 min, -20 °C). After blocking with 2 % BSA/PBS, cells were incubated  
227 with monoclonal mouse α-PCNA primary antibody (PC10, Cell Signaling Technology)  
228 diluted 1:2,400 in 10 % NGS/PBS at 4 °C overnight. After washing with 0.05 %  
229 Tween/PBS, cells were incubated with goat α-mouse AlexaFluor-568 secondary  
230 antibody diluted 1:400 in 10 % NGS/PBS (1 h, RT). After washing with 0.05 %  
231 Tween/PBS, cells were fixed again using 2 % PFA/PBS (10 min, RT). EdU was  
232 detected using the Klick-it EdU Imaging Kit with azide AlexaFluor-647. Coverslips were  
233 mounted on microscopy slides using Vectashield H-1000 (Vector Laboratories).  
234 Images were acquired at a DeltaVision OMX Blaze v4 (GE Healthcare) using an  
235 Olympus Plan Achromat 60x/1.42 oil objective. A z-stack of at least 20 slices (0.125  
236 µm step size) was acquired per image in SI mode. Reconstruction of SIM images and  
237 image registration of the channels was performed using softWoRx v6.5.2 (GE  
238 Healthcare). Pseudo-widefield images were generated with Fiji v1.51n and the  
239 SIMcheck plugin (v1.0 [47]).

240 Super resolved imaging by stochastic optical reconstruction microscopy (STORM)  
241 was carried out on U2-OS GFP-DEK cells cultured in McCoy's 5a modified medium  
242 (Thermo Fisher Scientific) supplemented with 10 % fetal bovine serum (FCS;  
243 Capricorn Scientific and PAA Laboratories), 100 U/ml penicillin and 100 µg/ml

244 streptomycin (both Thermo Fisher Scientific). For STORM imaging cells were plated  
245 on eight-well Lab-Tek coverglass chamber (Nunc), grown under standard conditions  
246 and fixed after 24 h. For STORM detection of DEK protein cells were fixed with  
247 methanol:ethanol (1:1) at -20 °C for 3 min, washed with PBS following blocking buffer  
248 for 2 h at RT (3 % BSA, 0.2% Triton X-100, PBS). After blocking and permeabilization,  
249 cells were incubated with primary antibodies diluted in blocking buffer, firstly for 2 h at  
250 RT and then overnight at 4 °C. The following primary antibodies were used: polyclonal  
251 chicken  $\alpha$ -GFP (1:2000; ab13970, Abcam), polyclonal rabbit  $\alpha$ -PCNA (1:50;  
252 HPA030522, Sigma-Aldrich). After six washing steps with blocking buffer for 5 min  
253 each, cells were incubated with secondary antibodies diluted in blocking buffer at RT  
254 for 1 h. Specific antibodies were used, namely: donkey  $\alpha$ -chicken  
255 AlexaFluor405/AlexaFluor647 (1:50; IgG (703-005-155, Jackson ImmunoResearch)  
256 coupled to reporter and activator dyes – AlexaFluor405 #A30000, Invitrogen and  
257 AlexaFluor647 #A2006), and goat  $\alpha$ -rabbit CF568 (1:1000; SAB4600084, Sigma-  
258 Aldrich).

259 Single-molecule localisation was performed using a Nikon N-STORM super-resolution  
260 microscope equipped with a 100x/1.40 oil-immersion objective lens and coupled to an  
261 Andor iXon DU-897E-CS0BV EMCCD camera (image pixel size 160 nm) with 30ms  
262 exposure time. To maintain the z-position a Nikon “perfect focus system” was used.  
263 The set-up included a 405 nm laser for activation (Coherent CUBE 405 nm; 100 mW)  
264 and a 647 nm readout laser (MPBC’s CW Visible Fiber Laser). Imaging was performed  
265 using TIRF illumination. 30.000 frames at 25 Hz frame rate were acquired. For  
266 widefield imaging together with STORM, a 561 nm laser (Coherent Sapphire OPSSL  
267 561 nm; 100 mW) was used. Dichroic mirrors and band-pass filters allowed for  
268 selection of emitted signals (ZET405/488/561/647, Chroma). For super-resolution

269 measurements, STORM imaging buffer was used (prepared following Nikon's STORM  
270 Protocol-Sample Preparation) containing GLOX solution as oxygen scavenging  
271 system (40 mg/ml Catalase, Sigma; 0.5 mg/ml glucose oxidase; 10 % glucose in PBS)  
272 and MEA 10 mM (Cysteamine MEA, Sigma-Aldrich, #30070-50G, in 360 mM Tris-HCl).  
273 Single molecule localization and super-resolution image reconstruction were  
274 performed using NIKON software (NIS elements) and a custom software (Insight3,  
275 custom software developed by B. Huang, University of California). Molecules are  
276 identified and x-y located by Gaussian fitting. The final image is reconstructed, after  
277 drift correction, by plotting each identified molecule as a Gaussian spot with a width  
278 corresponding to the achieved localization precision (9nm).

279

## 280 **Site-directed mutagenesis**

281 Nucleobase mutations of the DEK primary sequence were introduced via a modified  
282 Quick Change™ site-directed mutagenesis protocol [48]. To generate the DEK-GFP  
283 template for the mutagenesis PCR, the DEK WT sequence was inserted into an eGFP  
284 reporter plasmid (peGFP-N1, Addgene 6085-1). PAR-binding domain 2 (bases 583 -  
285 663) and the DEK shRNA target site (bases 1000 – 1020) were mutated using  
286 overlapping primer pairs containing the desired base changes. For the PAR-binding  
287 domain a total of 9 codons were mutated in four rounds of mutagenesis (primers  
288 PBD2-Part1-4, see also Fig 7 B). For the shRNA target site a total of 8 nucleobases  
289 were mutated in two rounds (primers shDEK-Part1-2), resulting in silent mutations and  
290 diminished binding of the DEK shRNA. Primer sequences are listed in S1 Table.

291

292 **Expression and purification of recombinant GST-tagged proteins**  
293 **from *E. coli***

294 The mutated DEK sequence (DEK PBD2-Mut2) was inserted into a GST expression  
295 plasmid. LB<sub>amp</sub> medium was inoculated with *E.coli* BL21(DE3) pGEX 4T-1 harbouring  
296 plasmids encoding GST only, GST-DEK WT, or GST-DEK PBD2-Mut2. Protein  
297 expression was induced using 0.5 mM IPTG (Merck) for 1.5 h. Bacteria were  
298 harvested via centrifugation (1,600 x g, 15 min, 4 °C), the pellet was resuspended in  
299 resuspension buffer (20 mM Tris-HCl pH 8, 1 M NaCl, 0.5 mM EDTA, 1 mM DTT) and  
300 shock frozen in liquid nitrogen. Cells were sonicated on ice, 0.5 % NP-40 (Merck) was  
301 added and the lysate was centrifuged (18,000 x g, 30 min, 4 °C). The supernatant was  
302 incubated with 200 µl Glutathion-Sepharose 4B-beads (GE Healthcare) equilibrated in  
303 wash buffer I (20 mM Tris-HCl pH 8, 500 mM NaCl, 0.5 mM EDTA, 1 mM DTT, 0.1 %  
304 NP-40) for 2 hours at 4 °C. Beads were washed with wash buffers of decreasing NaCl  
305 concentrations (500, 300 and 20 mM NaCl). For elution of GST-tagged DEK, beads  
306 were incubated with 200 µl of elution buffer (200 mM Tris-HCl pH 8, 20 mM NaCl, 40  
307 mM reduced glutathione, 10 % glycerol) for one hour at 4 °C. The GST-tagged protein  
308 containing supernatant was shock frozen in liquid nitrogen and stored at -80 °C.  
309 Protein concentrations were determined using the BCA Protein Assay Kit (Thermo  
310 Fisher Scientific) according to manufacturer's instructions.

311

312 **Electrophoretic Mobility Shift Assay (EMSA)**

313 Purified recombinant proteins (GST-DEK WT and GST-DEK PBD2-Mut2) were  
314 dialyzed in nE100 buffer (20 mM Hepes-KOH pH 7.6, 100 mM NaCl, 10 mM NaHSO<sub>3</sub>,  
315 1 mM EDTA, supplemented with 1 µg/ml BSA) using Millipore filters (VSWP 0.025 µm;

316 Merck) for 90 min at 4 °C. 175 ng of plasmid DNA were incubated with increasing  
317 amounts of recombinant DEK in a total volume of 30 µl nE100 buffer for one hour at  
318 37 °C. Samples were subjected to electrophoresis on a 0.6 % agarose gel in TBE  
319 buffer (50 mM Tris base, 80 mM boric acid, 1 mM EDTA, pH 8). DNA-protein  
320 complexes were visualized with 0.5 µg/ml ethidium bromide solution using a  
321 fluorescence imager.

322

### 323 ***In-vitro* synthesis of PAR**

324 PAR was synthesized and purified according to Fahrner et al. [49]. Briefly, 50 µg/ml  
325 'activator' oligonucleotide GGAATTCC and 60 µg/ml of both recombinant Histone H1  
326 und H2A were diluted in buffer containing 100 mM Tris-HCl pH 7.8, 10 mM MgCl<sub>2</sub> and  
327 1 mM DTT. To start the reaction, 1 mM NAD<sup>+</sup> (Merck) and 150 nM recombinant PARP1  
328 were supplemented. PAR synthesis was stopped after 15 min by adding ice-cold  
329 trichloroacetic acid (TCA) to a final concentration of 10 %. PAR was detached from  
330 histones and PARP1 itself using 0.5 M KOH/50 mM EDTA. After neutralization, DNA  
331 and proteins were digested using 110 µg/ml DNase and 220 µg/ml proteinase K (both  
332 Merck), respectively. PAR was purified by phenol-chloroform-isoamylalcohol  
333 extraction and ethanol precipitation. The concentration of the purified polymer was  
334 determined via absorbance at 258 nm.

335

### 336 **PAR overlay assay**

337 60 pmol of custom synthesized PAR-binding domain peptides (for sequences see Fig  
338 7 B and S 5 A Fig; biomers.net) or 25 pmol of recombinant GST-tagged proteins were  
339 transferred onto a nitrocellulose membrane using a slot blotting apparatus. The

340 membrane was allowed to air-dry and incubated overnight in 5 pmol PAR/TBST (100  
341 mM Tris-HCl, 150 mM NaCl, 0.5 % Tween 20) at 4 °C. Blots were blocked in 5 % milk  
342 powder/TBST and membrane-bound PAR was detected using monoclonal mouse  $\alpha$ -  
343 PAR antibody (1:300; 10H). After washing, the membrane was incubated with  
344 secondary antibody goat  $\alpha$ -mouse Ig/HRP (1:2,000; Agilent). PAR was detected using  
345 a chemiluminescence imager. To verify that equal amounts of proteins or peptides  
346 were blotted onto membranes, the same protein solutions as used for the PAR overlay  
347 were slot blotted onto a nitrocellulose membrane and allowed to air-dry. Samples were  
348 fixed in 7 % acetic acid/10 % methanol for 15 min at RT. After fixation, proteins or  
349 peptides were stained using Sypro Ruby Protein Blot Stain (Thermo Fisher Scientific)  
350 for 15 min and visualized using a Gel Doc XR system (Bio-Rad).

351

## 352 **Statistical analysis**

353 Statistical tests were performed using GraphPad Prism 5.02 and applied as indicated  
354 in the figure legends. \* $p \leq 0.05$ , \*\* $p \leq 0.01$ , \*\*\* $p \leq 0.001$ .

355

## 356 **RESULTS**

### 357 **The effect of short term PARP1 inhibition on mildly** 358 **challenged replication forks is reverted in DEK knockdown** 359 **cells**

360 To investigate whether PARylation regulates the impact of DEK on the replication  
361 stress response, we set out from our previous observation that downregulation of DEK  
362 expression aggravates replication fork slowing induced by low concentrations of CPT.  
363 Inhibition of topoisomerase1 by CPT stabilizes Topo1-cleavable complexes (Top1ccs),  
364 thus causing torsional stress ahead of the replication fork. As a result, fork progression  
365 is impaired, eventually leading to replisome disassembly and DNA strand breaks. At  
366 very low doses (25 nM), CPT was shown to slow down, but not arrest, fork progression  
367 and trigger fork reversal in a PARP1/2-dependent manner [10, 11].

368 Firstly, we examined the effect of DEK and PARP1/2 activity on CPT-induced  
369 replication fork progression using DNA fiber assays (Fig 1). Cells bearing a stable,  
370 lentiviral mediated knockdown of DEK expression (shDEK cells) and the respective  
371 control cells [43] were treated with 25 nM CPT in the presence and absence of ABT-  
372 888. Both drugs were added simultaneously with the IdU-containing medium (Fig 1 A).  
373 In line with our previous results, knockdown of DEK expression slowed down  
374 replication fork progression *per se* as indicated by a highly significant reduction of the  
375 IdU tract lengths in untreated shDEK cells as compared to controls (Fig 1 C and [43]).  
376 Inhibition of PARP1/2 activity with ABT-888 had no significant effect on replication fork  
377 speed in both control and shDEK cells, measured as the ratio of the IdU-labelled tracts  
378 (green) vs the CldU-labelled tracts (red) (Fig 1 D, compare boxes 1 and 2). Notably,



379 in all our PARP1/2 inhibition experiments, we took care of minimizing DNA damage  
380 due to trapping of the enzyme on DNA [7]. Therefore, we used ABT-888 as an inhibitor  
381 with reportedly low trapping activity and limited the exposure to the duration of the IdU-  
382 pulse. PARP1/2 activity is effectively inhibited under these conditions (S1 A, B Fig) but  
383 does not trigger a DNA damage response, as indicated by the absence of 53BP1 foci  
384 formation (S1 C, D Fig; see also [50, 51]).

385

386 **Fig 1. Combined inactivation of DEK and PARP1/2 prevents fork slowing by**  
387 **low doses of CPT and HU**

388 (A) Scheme of the DNA fiber assay. U2-OS control and shDEK cells were pulse-  
389 labelled with CldU for 20 min, followed by incubation with IdU for 20 min in the  
390 presence or absence of replication stress inducers (25 nM CPT or 10  $\mu$ M HU) and 1  
391  $\mu$ M ABT-888. (B) Representative microscopic images of DNA fibers after spreading.  
392 Thymidine analogues were visualized via indirect immunofluorescence. CldU-labelled  
393 tracts were visualized in the red channel, IdU-labelled tracts in the green channel.  
394 Scale bar: 5  $\mu$ m. (C-D) Quantification of CldU and IdU tract lengths of at least 250  
395 fibers per experimental condition. The experiment was performed in triplicates. The  
396 bands inside the boxes display the median, whiskers indicate the 5th to 95th percentile  
397 and black dots mark outliers. t-test: ns: not significant, \*\*\*  $p \leq 0.001$ . ABT-888 treated  
398 cells: hatched bars. (C) Lengths of IdU-labelled tracts. (D) IdU/CldU tract length ratios.

399

400 Treatment with low doses of CPT reduced fork progression, as expected, in control  
401 cells and, to a greater extent, in shDEK cells (Fig 1 D, compare boxes 3 and 9). When  
402 exposure to CPT occurred in the presence of ABT-888, the two cells lines, however,  
403 showed opposite responses: in control cells, the replication fork was further retarded

404 as compared to treatment with CPT only, while in shDEK cells, fork speed recovered  
405 to the basal level measured in the absence of any perturbation (Fig 1 D, compare  
406 boxes 4 and 10). Further, in the presence of CPT, the extent of fork slowing obtained  
407 by inhibiting PARP1/2 in control cells equalled that resulting from downregulation of  
408 DEK expression (Fig 1 D, compare boxes 4 and 9), which is suggestive of DEK and  
409 PARP1/2 acting in the same regulatory pathway.

410 We sought to validate these observations in a different replication stress model and  
411 performed fiber assays using low doses of hydroxyurea (HU). At 10  $\mu$ m, HU slows  
412 down but does not stall the replication fork as observed at higher concentrations (e.g.  
413 2mM, compare Fig 1 D with S2 Fig). Again, additional PARP1/2 inhibition positively  
414 impacted on fork progression in shDEK cells, but not in control cells (Fig 1 D, compare  
415 boxes 6 and 12). Interestingly, this modulatory effect was detectable only under mild  
416 replication stress conditions. At a concentration of HU of 2 mM, combined exposure  
417 to ABT-888 did not alter fork speed, although in general, replication forks of shDEK  
418 cells were significantly more sensitive to HU-mediated stalling than those of control  
419 cells (S2 Fig). Finally, the fork acceleration observed in mildly stressed, PARylation  
420 inhibited shDEK cells was not sufficient to compensate for the fork impairment caused  
421 by DEK downregulation itself, because the IdU tract length in stressed and PARP1/2-  
422 inhibited shDEK cells remained shorter than in control untreated cells (Fig 1 C).

423 As replication stress is a source of DNA damage, we evaluated whether DEK  
424 downregulation would also affect the formation of DNA strand breaks caused by  
425 exposure to replication inhibitors and ABT-888. We assessed replication-associated  
426 DSBs by counting  $\gamma$ H2AX/53BP1 double-positive foci in EdU-positive S-phase shDEK  
427 and control cells. In the case of CPT, DNA strand breaks are known to arise when the  
428 transcription and/or replication machineries collide with unrepaired Top1ccs. At 25 nM

429 CPT, the overall response was very moderate as expected at this subtoxic dose [11].  
430 Only 7 foci were observed on average in control cells (Fig 2 A, B). This low number  
431 was nevertheless significantly higher in shDEK cells, in line with our previous data  
432 showing that DEK downregulation sensitizes cells to CPT treatment [20]. The  
433 combination of CPT and PARP1/2 inhibition led to an increase in DSBs in control cells,  
434 while shDEK cells showed a significant reduction, resembling the pattern observed  
435 with our fiber assays. These data suggest that the restoration of fork speed observed  
436 in CPT-treated, DEK-depleted cells when PARP1/2 is inhibited is not a manifestation  
437 of fork run off. Most likely, this effect reflects the ability of shDEK cells to either  
438 withstand the action of CPT or better cope with its consequences, if PARP1/2 activity  
439 is blocked. Unfortunately, this assumption could not be confirmed in the HU-model of  
440 replication stress, since exposure to 10  $\mu$ M HU did not result in a measurable DNA  
441 damage response in our experimental setting (Fig 2 A, B).

442

443 **Fig 2. Combined inactivation of DEK and PARP1/2 counteracts DNA damage**  
444 **induced by low doses of CPT**

445 U2-OS control and shDEK cells were pulse-labelled with EdU, then either left  
446 untreated or treated with replication stress inducers (25 nM CPT or 10  $\mu$ M HU) for one  
447 hour, in the presence or absence of 1  $\mu$ M ABT-888. 53BP1 (red) and  $\gamma$ H2AX (green)  
448 foci formation was visualized via indirect immunofluorescence analysis, EdU (magenta)  
449 using click chemistry. DNA was counterstained with Hoechst 33342 (cyan). (A)  
450 Representative confocal images. Scale bar: 5  $\mu$ m. (B) Quantification of 53BP1/ $\gamma$ H2AX  
451 colocalization in S-phase cells. Foci were counted and colocalization determined using  
452 the foci counter of the BIC macro tool box. At least 118 cells per experimental condition  
453 were evaluated. The experiment was performed in triplicates. The bands inside the

454 boxes display the median, whiskers indicate the 5th to 95th percentile and outliers are  
455 omitted for clarity. t-test: \*\*\*  $p \leq 0.001$ .

456

457 Altogether, these data show that the outcome of acute PARP1/2 inhibition on  
458 challenged replication forks is dependent on DEK expression levels and suggest the  
459 existence of a regulatory network involving DEK and PARP1/2 that modulates fork  
460 speed. This interaction is only detectable under mild stress levels, when the fork is still  
461 processive.

462

## 463 **DEK is not part of the replisome but binds to newly** 464 **replicated DNA as it matures to chromatin**

465 The marked effects of DEK expression on fork progression let us explore whether DEK  
466 directly associates to replication forks. To this end, we performed iPOND (isolation of  
467 proteins on nascent DNA) assays [44]. Firstly, we treated HeLa S3 cells with EdU for  
468 increasing time periods (2.5 min – 30 min) to label newly synthesized DNA and  
469 subsequently monitored the occurrence of DEK in the pool of enriched proteins by  
470 Western Blot (Fig 3 A-C). We used PCNA to monitor the active replisome while histone  
471 H3 served as marker for maturing chromatin. PCNA was detected at early time points  
472 (5 min and 10 min) representing nascent DNA. DEK lagged behind and appeared after  
473 an EdU pulse of 15 min duration, concomitantly with H3. We corroborated this result  
474 with an iPOND pulse-chase experiment, in which we sought to observe the dynamics  
475 of DEK binding to nascent chromatin (Fig 3 D-F). EdU was applied for 10 min to pulse-  
476 label nascent DNA and then replaced with thymidine for increasing time periods before  
477 the isolation of proteins crosslinked to DNA. Proteins binding directly and exclusively

478 at the replication fork diminish in the enriched protein fraction as the EdU labelled DNA  
479 stretch moves away from the fork, as exemplified by PCNA. In line with the pulse-only  
480 experiment, DEK was found to bind at later time points, with relative Western Blot  
481 signal intensities increasing to significance at 15 to 30 min after thymidine addition.  
482 Here too, DEK behaved similarly to histone H3. From these experiments we conclude  
483 that DEK is not a component of the active replisome but rather binds to DNA as it  
484 assembles into mature chromatin.

485

486 **Fig 3. DEK is not a component of the replisome**

487 (A-C) HeLa S3 cells were pulse-labelled with EdU for 2.5 – 30 min and biotin-azide  
488 was covalently attached via click chemistry. After cell lysis, EdU-biotin containing DNA  
489 fragments were precipitated using streptavidin-coupled magnetic beads. Bound  
490 proteins (capture) were identified by Western blot analysis. (A) Scheme of iPOND  
491 pulse experiment. (B) Representative Western blots of input and capture samples  
492 using antibodies specific for DEK, PCNA and histone H3. (C) Densitometric analysis.  
493 The fold change of captured protein is displayed relative to the value of the 30 min  
494 time point. Band intensities of capture samples were normalized to the respective input  
495 samples. Shown are mean values from five independent experiments. One-sided error  
496 bars represent the S.D. 2way ANOVA with Bonferroni posttest: \*  $p \leq 0.05$ , \*\*  $p \leq 0.01$ ,  
497 \*\*\*  $p \leq 0.001$ .

498 (D-F) HeLa S3 cells were pulse-labelled with EdU for 10 min, followed by a chase into  
499 thymidine containing medium for 0 – 30 min. iPOND was performed as in (A-C). (D)  
500 Scheme of iPOND chase experiment. (E) Representative Western blots of input and  
501 capture samples using antibodies specific for DEK, PCNA and histone H3. (F)  
502 Densitometric analysis. The fold change of captured protein is displayed relative to the

503 value of the 0 min time point. Band intensities were normalized as in (C). Shown are  
504 mean values from five independent experiments, one-sided error bars represent the  
505 S.D. 2way ANOVA with Bonferroni posttest: \*  $p \leq 0.05$ , \*\*  $p \leq 0.01$ , \*\*\*  $p \leq 0.001$ .

506

507 To complement this biochemical approach we studied the localization of DEK in  
508 replicating cells by superresolution microscopy (Fig 4). To this purpose, we took  
509 advantage of a U2-OS knock-in cell line expressing GFP-DEK from its endogenous  
510 promoter (Vogel et al, in preparation). Firstly, we employed structured illumination  
511 microscopy [52] and combined EdU labelling of nascent DNA with immunolabeling of  
512 PCNA. The images showed that DEK does not colocalize with sites of active  
513 replication (Fig 4 A). This finding was corroborated by stochastic optical reconstruction  
514 microscopy (STORM, Fig 4 B) [53]. This approach offers a key chance to investigate  
515 the distribution of nuclear proteins at the nanoscale level [54]. Also at this higher  
516 resolution, DEK is not found colocalizing with PCNA. Presently, we cannot exclude  
517 that the localization of DEK with respect to active replication foci may vary during S-  
518 phase progression, thus accounting for a partial enrichment of DEK in late chromatin  
519 fractions in iPOND experiments. Altogether, based on these data, we can exclude that  
520 DEK is part of the replisome making it very unlikely that its function in promoting  
521 replication fork progression occurs via a direct interaction.

522

#### 523 **Fig 4. DEK does not colocalize with replication foci in superresolution images**

524 (A) 3D-SIM superresolution microscopy images of DEK, EdU and PCNA distribution  
525 in early/mid S-phase. U2-OS GFP-DEK cells were treated with EdU for 10 min to label  
526 nascent DNA via click chemistry, and PCNA was visualized via indirect  
527 immunofluorescence. Shown is a single z-slice from the super-resolved image stack

528 with two magnified insets. Red: GFP-DEK, green: PCNA (green), magenta: EdU.  
529 Upper left corner: Pseudo-widefield representation of the same nucleus by  
530 superimposition of all z-slices. (B) STORM superresolution microscopy images of DEK  
531 and PCNA distribution in early S-phase. DEK (red) and PCNA (green) were visualized  
532 via indirect immunofluorescence in U2-OS GFP-DEK cells with Alexa405/Alexa647  
533 photoswitchable dye pairs respectively CF568. Shown is a single z-slice with two  
534 magnified insets. Top left corner: Widefield image of the same nucleus.

535

## 536 **Fork restart impairment observed under PARP1/2 inhibition** 537 **depends on DEK expression**

538 As we had observed that the effect of PARP1/2 inhibition on mildly impaired replication  
539 forks depended on DEK expression, we asked whether DEK levels would also impinge  
540 on the recovery of replication forks after stalling. PARP1/2 was shown to protect  
541 replication forks stalled by HU treatment and promote their effective restart [8, 9, 55],  
542 providing a suitable experimental paradigm to evaluate the effect of DEK  
543 downregulation.

544 We performed DNA fiber assays in shDEK and control cells in which forks were  
545 completely blocked using a prolonged exposure to a high dose of HU (4 mM for 4 h,  
546 see also S3 Fig), followed by removal of HU and release in fresh medium in the  
547 presence and absence of ABT-888 (Fig 5 A). Downregulation of DEK alone had no  
548 effect on the resumption of DNA synthesis after removal of HU, with about 80% of  
549 forks restarting in both control and shDEK cells. In the former, PARP1/2 inhibition led  
550 to a marked decrease of fork restart efficiency to about 60%, in line with published  
551 results [8]. In contrast, shDEK cells were completely protected from restart impairment,

552 displaying a slightly higher number of restarting forks as compared to control cells not  
553 exposed to ABT-888 (Fig 5 C). These data reflect the same phenotype of DEK  
554 downregulation counteracting PARP1/2 inhibition as observed in the context of fork  
555 slowing by CPT, and underscore its functional relevance.

556

557 **Fig 5. DEK depletion counteracts fork restart impairment due to PARP1/2**  
558 **inhibition**

559 (A-C) U2-OS control and shDEK cells were pulse-labelled with CldU for 20 min,  
560 followed by incubation with 4 mM HU for four hours to arrest replication forks. Forks  
561 were released in fresh IdU-containing medium in the presence or absence of 1  $\mu$ M  
562 ABT-888. (A) Scheme of the fork restart experiment. (B) Representative confocal  
563 images for each experimental condition. CldU-labelled tracts were visualized in the  
564 red channel, IdU-labelled tracts in the green channel. Scale bar: 5  $\mu$ m. (C)  
565 Quantification of results. The mean percentage of restarting forks from three  
566 independent experiments is shown. At least 300 fiber tracts were scored per  
567 experimental condition. Error bars represent the S.E.M. t-test: ns: not significant, \*  
568  $p \leq 0.05$ , \*\*  $p \leq 0.01$ . ABT-888 treated cells: hatched bars.

569

570 Fork impairment and stalling by HU treatment has been shown previously to elicit the  
571 robust formation of RPA-positive foci [56], reflecting RPA binding to single stranded  
572 DNA (ssDNA) which is extensively generated when polymerase and helicase activity  
573 are uncoupled. RPA protects this ssDNA from nucleolytic attack and serves multiple  
574 important functions in the repair and restart of damaged forks [57, 58]. To further  
575 investigate the effect of DEK expression on impaired replication forks we determined  
576 the formation of RPA-positive foci under conditions of replication stress combined with



577 PARylation inhibition (Fig 6). We applied 2 mM HU for 80 min, as this dose and time  
578 of exposure was shown to elicit a maximal HU response in U2-OS cells [56], and  
579 measured RPA foci in EdU positive cells (see also S4 Fig for the quantification method).  
580 As observed for fork slowing and DSB formation, shDEK cells showed a significantly  
581 increased RPA response as compared to control cells. In the latter, additional  
582 PARP1/2 inhibition reduced the formation of RPA foci with respect to HU treatment  
583 only. This finding is in line with data from Bryant et al. [8] who reported reduced RPA  
584 foci in PARP-inhibited cells. Again, shDEK cells reacted differently, displaying a small,  
585 but significant increase in RPA-positive cells when exposed to HU in combination with  
586 ABT-888 (Fig 6 B). These data suggest that DEK plays a role in limiting the formation  
587 of long ssDNA stretches upon stalling or collapse of replication forks, and that its  
588 downregulation compensates for the previously described requirement for PARP1/2  
589 activity for RPA binding at a subpopulation of stalled forks. These results further  
590 corroborate the existence of a reciprocal functional link between DEK and PARP1/2 in  
591 the response to replication stress.

592

593 **Fig 6. DEK counteracts the effect of ABT-888 on RPA foci formation under HU**  
594 **treatment**

595 (A-B) U2-OS control and shDEK cells were pulse-labelled with EdU, then either left  
596 untreated or treated with 2 mM HU for 80 min in presence or absence of 1  $\mu$ M ABT-  
597 888. RPA foci (green) were visualized via indirect immunofluorescence, EdU (magenta)  
598 using click chemistry. DNA was counterstained with Hoechst 33342 (cyan). (A)  
599 Representative confocal images for each experimental condition. Scale bar: 5  $\mu$ m. (B)  
600 Percentage of RPA positive S-phase cells as determined using the automated foci  
601 counter of the BIC macro tool box (see also S4 Fig). Mean values from three

602 independent experiments are shown. At least 97 cells were scored per experimental  
603 condition. Error bars represent the S.E.M. t-test: \* $p \leq 0.05$ , \*\* $p \leq 0.01$ .

604

605 **A DEK mutant with impaired PAR-interaction ability**  
606 **counteracts the effect of DEK downregulation on the**  
607 **response to replication fork stalling**

608 In our previous work we described that DEK is modified by PAR covalently and non-  
609 covalently [18, 20, 49]. Interestingly, DEK shows a remarkably high affinity for long  
610 PAR chains exceeding that of histone H1. Therefore, we hypothesized that  
611 noncovalent DEK-PAR interaction would be important to mediate the effect of DEK on  
612 challenged replication forks. To verify this hypothesis, we sought to obtain a PAR-  
613 binding deficient mutant of DEK. We performed a systematic mutational study of the  
614 three previously described PAR-binding domains (PBDs) in the DEK primary  
615 sequence (PBD1: aa 158-181, PBD2: aa 195-222; PBD3: aa 329-352; Fig 7 A and S1  
616 Table). Previous *in vitro* studies showed that they have different affinities for purified  
617 PAR. The strongest PAR binding domain in the DEK primary sequence is PBD2 at  
618 amino acid positions 195-222, partially overlapping with the SAP-box of DEK, which  
619 is its major DNA-binding domain [18]. Mutant peptides corresponding to the three  
620 PAR-binding domains of DEK were subjected to PAR-overlay assays to assess the  
621 effect of single and multiple amino acid exchanges on PAR binding *in vitro* (Fig 7 B,  
622 C; S5 Fig). We were able to identify mutations within the high-affinity PBD2 peptide  
623 which completely abrogated non-covalent PAR interaction (Fig 7 B, C, Mut1-3).  
624 Moreover, when peptides corresponding to the three PBDs were incubated  
625 simultaneously with purified PAR in the same slot blot, only peptide 195-222 gave rise

626 to PAR-specific signals, suggesting that this domain is the predominant PAR-acceptor  
627 in DEK, outcompeting the weaker PBDs (data not shown). We then generated purified  
628 recombinant DEK carrying a mutated PBD2 (Mut2) and tested the effect of the  
629 identified mutations in the context of the full-length protein (Fig 7 D). By densitometric  
630 analysis we observed a reduction in PAR-binding affinity of about 50% as compared  
631 to the corresponding wildtype DEK sequence, confirming the data obtained with the  
632 isolated peptides. The overall DNA binding ability of the PBD2-Mut2 mutant was only  
633 slightly reduced as compared to the wildtype DEK. A band shift in EMSA assays  
634 became detectable at a molar ratio of DEK:DNA of 112 instead of 84. At higher molar  
635 ratios the binding behaviour of the two proteins was undistinguishable (Fig 7 E).

636

637 **Fig 7. Non-covalent interaction of DEK with PAR is important for RPA foci**  
638 **formation upon HU treatment**

639 (A) Schematic of the DEK protein with PAR-binding domains and DNA interaction sites.  
640 (B) Mutational analysis of PBD2 using recombinant peptides. Basic (green) and/or  
641 hydrophobic (blue) amino acids were exchanged for alanine (red) as indicated. (C)  
642 Peptides were analysed in a PAR overlay assay to assess PAR-binding. PAR was  
643 detected by chemiluminescence using a specific antibody ( $\alpha$ -PAR-10H). Equal  
644 membrane loading of peptides was verified using Sypro Ruby. One representative blot  
645 is shown. The experiment was performed in triplicate with similar results. (D)  
646 Recombinant full-length GST-DEK WT and GST-DEK PBD2-Mut2 were purified from  
647 *E.coli* and analysed using PAR-overlay assays. One representative blot out of two  
648 replicates is shown. (E) Analysis of the DNA binding ability of GST-DEK WT and GST-  
649 DEK PBD2-Mut2 via EMSA. Recombinant proteins were incubated with plasmid DNA  
650 in increasing molar ratios. DEK/DNA complexes were separated on agarose gels and

651 visualized using ethidium bromide. One representative gel out of two replicates is  
652 shown. (F) Analysis of RPA foci formation. U2-OS shDEK cells were transfected with  
653 plasmids encoding GFP fused to either WT-DEK or DEK PBD2-Mut2. GFP-positive,  
654 low-level expressing cells were isolated by FACS. U2-OS control and shDEK cells  
655 expressing GFP-DEK fusion proteins were treated with 2 mM HU for 80 min. RPA foci  
656 formation was analysed by immunofluorescence as described in Fig 6, S-phase cells  
657 were identified by EdU labelling. The percentage of RPA positive S-phase cells was  
658 determined using the automated foci counter of the BIC macro tool box. The mean  
659 values from three independent experiments are shown. At least 100 cells were scored  
660 per experimental condition. Error bars represent the S.E.M. t-test: ns: not significant,  
661 \*  $p \leq 0.05$ .

662

663 We then used the PDB2-Mut2 mutant to analyse the influence of PARylation of DEK  
664 on the formation of RPA foci upon fork stalling. Wildtype or PBD2-Mut2-DEK fused to  
665 GFP were expressed in shDEK and control cells and the number of RPA-positive cells  
666 after HU treatment was determined as above. Both GFP fusion proteins were  
667 expressed at comparable levels as verified by Western blot (S6 Fig).

668 Treatment with 2 mM HU robustly triggered RPA foci formation, to a higher level in  
669 shDEK cells as compared to controls, as already observed (Fig 7 F). Re-expression  
670 of WT DEK abrogated this effect confirming its specificity and reducing the number of  
671 RPA-positive cells to a level below that of HU-treated control cells. Importantly, the  
672 DEK mutant with reduced PAR-binding ability was much less effective in counteracting  
673 RPA-foci formation. We conclude from this result that the increase in HU-induced RPA  
674 foci mediated by DEK requires its non-covalent interaction with PAR. We cannot rule  
675 out, however, that other mechanisms and/or PAR-binding domains of DEK may be

676 involved too, because the PBD2-Mut2 did not fully restore the level of RPA foci  
677 obtained in shDEK cells after HU treatment (Fig 7 F). Taken together, these data  
678 strongly suggest that the non-covalent interaction with PAR plays a major role in  
679 regulating how DEK affects the response to replication stress providing a first  
680 mechanistic insight in the complex molecular interplay of PARP1/2 and DEK.

681

## 682 **DISCUSSION**

683 In this study we have explored a potential functional relationship between DEK and  
684 PARP1/2 in the context of DNA replication stress. For both proteins, there is consistent  
685 evidence for their involvement in the response to impaired DNA replication. Both DEK  
686 and PARP1/2 preferentially bind to unconventional non-B DNA structures like  
687 cruciform and G4 DNA [36, 59-61]. These structures are difficult to replicate and  
688 particularly abundant in heterochromatin. Both DEK and PARP1/2 are found enriched  
689 in chromatin of S-phase cells [62-65] and have been associated with the formation  
690 and maintenance of heterochromatin [39, 66]. DEK was shown to modulate the  
691 efficiency of DNA replication *in vitro* [42], and, more recently, we showed that normal  
692 DEK levels are necessary to sustain replication fork progression and to prevent fork  
693 rearrangements in cells undergoing replication stress [43]. DEK is a target for covalent  
694 modification by and non-covalent interaction with PAR. Covalent PARylation was  
695 reported to occur at glutamic acid 136 [67] and 207 [68], arginine 208 [68] and, most  
696 recently, at serine 279 [69]. Based on sequence alignment, DEK was further proposed  
697 to harbour three non-covalent PAR-binding domains [18], of which the central one (aa  
698 position 195-222) shows the strongest binding affinity and mediates about 50% of the  
699 PAR-binding activity of the protein *in vitro* (this study and [70]).

700 Impaired replication forks can activate PARP1/2 and PAR has been involved in the  
701 regulation of different types of fork processing and rearrangements. Thus, PARP1/2  
702 can protect replication forks from extensive Mre11-dependent resection after HU  
703 treatment [8, 9], or from untimely resolution of RecQ-mediated reversal in cells treated  
704 with low doses of CPT [11]. Massive accumulation PAR, on the other hand, has  
705 adverse consequences. HU-induced prolonged fork stalling in cells with  
706 downregulated PAR glycohydrolase (PARG) leads to fork collapse and DSB formation  
707 [71]. The molecular events orchestrated by PARP1/2 activation during DNA replication  
708 therefore seem to depend, in a yet poorly understood fashion, on the type and extent  
709 of the replication problem, which in turn determine the amount and possibly also the  
710 structure of the polymer formed. Consequently, inhibiting PARylation during DNA  
711 replication may have different outcomes, depending not only on the dose and the  
712 duration of the inhibitor treatment but also on the status of the replication machinery.  
713 As shown here, short term inhibition of PARP1/2 using ABT-888 aggravates fork  
714 retardation and DNA damage induced by mild replication stress, while long term  
715 exposure to AZD-2281 was shown to accelerate fork speed both in the presence and  
716 in the absence of DNA replication inhibitors [10, 72]. Our data on fork progression in  
717 shDEK cells suggest that challenged replication forks can switch between two  
718 opposing responses to PARP1/2 inhibition depending on the level of DEK expression.  
719 Interestingly, the restoration of fork speed observed in CPT-treated, PARP-inhibited  
720 shDEK cells was accompanied by a reduction in the level of replication-associated  
721 DSBs. This is in agreement with the finding that fork acceleration activates the DNA  
722 damage response only if fork speed exceeds a critical threshold [72], and poses an  
723 argument against replication fork runoff occurring in CPT-treated shDEK cells upon  
724 treatment with ABT-888. The behaviour of forks stalled by high doses of HU followed

725 a similar pattern with respect to PARP-inhibition and DEK downregulation as CPT-  
726 induced fork slowing, being most efficiently restored in PARP-inhibited shDEK cells,  
727 which is suggestive of a common mechanism.

728 How DEK affects the sensitivity of replication forks towards PARP inhibition, is a matter  
729 of speculation so far. Based on our iPOND and superresolution microscopy data it  
730 seems unlikely that DEK acts directly at the fork, since we did not find it associated to  
731 nascent DNA before the stage of nucleosome formation. Rather, the data presented  
732 here lend credit to the hypothesis that DEK is part of a DNA replication regulatory  
733 circuitry orchestrated by PAR that affects response to acute PARPi treatment.  
734 Recently, a fork speed regulatory network has been proposed which controls  
735 replication fork progression via PARylation and the p53-p21 axis [72]. Both p21 and  
736 PAR act as suppressors of fork speed in an interdependent manner, as PARP1  
737 additionally represses p21 expression. Intriguingly, downregulation of DEK expression  
738 was shown to result in p53 stabilization and increased p21 levels [32], alterations  
739 which may indirectly affect the response of fork speed to PARP1/2 inhibitors. Since a  
740 PAR-binding defective mutant of DEK partially rescued fork restart impairment by  
741 PARP inhibition we cannot exclude that DEK exerts its influence also by directly  
742 participating in the PARylation mediated sensing of replication problems. Altogether,  
743 this study pinpoints DEK as an important mediator of the PARP1/2-dependent  
744 response of replicating cells to fork impairment, a previously unrecognized function of  
745 DEK which has implications for tumor therapy and warrants further investigation.

746 **ACKNOWLEDGEMENTS**

747 We thank Eva Gwosch for providing U2-OS GFP-DEK cells, and Aswin Mangerich,  
748 Martin Stöckl and the whole BIC team for fruitful discussions. Further, we thank Anja  
749 Deutzmann for initial input in this study, and the FlowKon core facility at the University  
750 of Konstanz for cell sorting.

751

752



753

## REFERENCES

- 754 1. Palazzo L, Ahel I. PARPs in genome stability and signal transduction: implications  
755 for cancer therapy. *Biochem Soc Trans.* 2018. doi: 10.1042/BST20180418.
- 756 2. Bai P. Biology of Poly(ADP-Ribose) Polymerases: The Factotums of Cell  
757 Maintenance. *Molecular cell.* 2015;58(6):947-58. doi: 10.1016/j.molcel.2015.01.034.
- 758 3. Miwa M, Sugimura T. Splitting of the ribose-ribose linkage of poly(adenosine  
759 diphosphate-ribose) by a calf thymus extract. *J Biol Chem.* 1971;246(20):6362-4.
- 760 4. Kurnit KC, Coleman RL, Westin SN. Using PARP Inhibitors in the Treatment of  
761 Patients With Ovarian Cancer. *Curr Treat Options Oncol.* 2018;19(12):1. doi:  
762 10.1007/s11864-018-0572-7.
- 763 5. Bryant HE, Schultz N, Thomas HD, Parker KM, Flower D, Lopez E, et al. Specific  
764 killing of BRCA2-deficient tumours with inhibitors of poly(ADP-ribose) polymerase.  
765 *Nature.* 2005;434(7035):913-7. doi: 10.1038/nature03443.
- 766 6. Farmer H, McCabe N, Lord CJ, Tutt AN, Johnson DA, Richardson TB, et al.  
767 Targeting the DNA repair defect in BRCA mutant cells as a therapeutic strategy.  
768 *Nature.* 2005;434(7035):917-21. doi: 10.1038/nature03445.
- 769 7. Murai J, Huang S-yN, Das BB, Renaud A, Zhang Y, Doroshow JH, et al. Differential  
770 trapping of PARP1 and PARP2 by clinical PARP inhibitors. *Cancer research.*  
771 2012;72(21):5588-99. doi: 10.1158/0008-5472.CAN-12-2753.
- 772 8. Bryant HE, Petermann E, Schultz N, Jemth AS, Loseva O, Issaeva N, et al. PARP  
773 is activated at stalled forks to mediate Mre11-dependent replication restart and  
774 recombination. *EMBO J.* 2009;28(17):2601-15. Epub 2009/07/25. doi:  
775 emboj2009206
- 776 9. Ying S, Hamdy FC, Helleday T. Mre11-dependent degradation of stalled DNA  
777 replication forks is prevented by BRCA2 and PARP1. *Cancer Res.*  
778 2012;72(11):2814-21. Epub 2012/03/27. doi: 10.1158/0008-5472.can-11-3417.
- 779 10. Berti M, Ray Chaudhuri A, Thangavel S, Gomathinayagam S, Kenig S, Vujanovic  
780 M, et al. Human RECQ1 promotes restart of replication forks reversed by DNA  
781 topoisomerase I inhibition. *Nature structural & molecular biology.* 2013;20(3):347-  
782 54. doi: 10.1038/nsmb.2501.
- 783 11. Ray Chaudhuri A, Hashimoto Y, Herrador R, Neelsen KJ, Fachinetti D, Bermejo  
784 R, et al. Topoisomerase I poisoning results in PARP-mediated replication fork  
785 reversal. *Nature structural & molecular biology.* 2012;19(4):417-23. doi:  
786 10.1038/nsmb.2258.
- 787 12. Hanzlikova H, Kalasova I, Demin AA, Pennicott LE, Cihlarova Z, Caldecott KW.  
788 The Importance of Poly(ADP-Ribose) Polymerase as a Sensor of Unligated  
789 Okazaki Fragments during DNA Replication. *Molecular cell.* 2018;71(2):319-31 e3.  
790 doi: 10.1016/j.molcel.2018.06.004.
- 791 13. Waldmann T, Scholten I, Kappes F, Hu HG, Knippers R. The DEK protein-an  
792 abundant and ubiquitous constituent of mammalian chromatin. *Gene.*  
793 2004;343(1):1-9.
- 794 14. Kappes F, Damoc C, Knippers R, Przybylski M, Pinna LA, Gruss C.  
795 Phosphorylation by protein kinase CK2 changes the DNA binding properties of the  
796 human chromatin protein DEK. *Mol Cell Biol.* 2004;24(13):6011-20. Epub  
797 2004/06/17. doi: 10.1128/MCB.24.13.6011-6020.2004.

- 798 15. Kappes F, Scholten I, Richter N, Gruss C, Waldmann T. Functional domains of  
799 the ubiquitous chromatin protein DEK. *Mol Cell Biol.* 2004;24(13):6000-10. Epub  
800 2004/06/17. doi: 10.1128/MCB.24.13.6000-6010.2004.
- 801 16. Cleary J, Sitwala KV, Khodadoust MS, Kwok RP, Mor-Vaknin N, Cebrat M, et al.  
802 p300/CBP-associated factor drives DEK into interchromatin granule clusters. *J Biol*  
803 *Chem.* 2005;280(36):31760-7. Epub 2005/07/01. doi: 10.1074/jbc.M500884200.
- 804 17. Mor-Vaknin N, Kappes F, Dick AE, Legendre M, Damoc C, Teitz-Tennenbaum  
805 S, et al. DEK in the synovium of patients with juvenile idiopathic arthritis:  
806 characterization of DEK antibodies and posttranslational modification of the DEK  
807 autoantigen. *Arthritis Rheum.* 2011;63(2):556-67. Epub 2011/02/01. doi:  
808 10.1002/art.30138.
- 809 18. Fahrner J, Popp O, Malanga M, Beneke S, Markovitz DM, Ferrando-May E, et al.  
810 High-affinity interaction of poly(ADP-ribose) and the human DEK oncoprotein  
811 depends upon chain length. *Biochemistry.* 2010;49(33):7119-30. doi:  
812 10.1021/bi1004365.
- 813 19. Gamble MJ, Fisher RP. SET and PARP1 remove DEK from chromatin to permit  
814 access by the transcription machinery. *Nature structural & molecular biology.*  
815 2007;14(6):548-55. Epub 2007/05/29. doi: 10.1038/nsmb1248.
- 816 20. Kappes F, Fahrner J, Khodadoust MS, Tabbert A, Strasser C, Mor-Vaknin N, et  
817 al. DEK is a poly(ADP-ribose) acceptor in apoptosis and mediates resistance to  
818 genotoxic stress. *Mol Cell Biol.* 2008;28(10):3245-57.
- 819 21. Wise-Draper TM, Allen HV, Thobe MN, Jones EE, Habash KB, Munger K, et al.  
820 The human DEK proto-oncogene is a senescence inhibitor and an upregulated  
821 target of high-risk human papillomavirus E7. *J Virol.* 2005;79(22):14309-17.
- 822 22. Privette Vinnedge LM, McClaine R, Wagh PK, Wikenheiser-Brokamp KA, Waltz  
823 SE, Wells SI. The human DEK oncogene stimulates beta-catenin signaling,  
824 invasion and mammosphere formation in breast cancer. *Oncogene.*  
825 2011;30(24):2741-52. Epub 2011/02/15. doi: 10.1038/onc.2011.2.
- 826 23. Hacker KE, Bolland DE, Tan L, Saha AK, Niknafs YS, Markovitz DM, et al. The  
827 DEK Oncoprotein Functions in Ovarian Cancer Growth and Survival. *Neoplasia.*  
828 2018;20(12):1209-18. doi: 10.1016/j.neo.2018.10.005.
- 829 24. Han S, Xuan Y, Liu S, Zhang M, Jin D, Jin R, et al. Clinicopathological  
830 significance of DEK overexpression in serous ovarian tumors. *Pathol Int.*  
831 2009;59(7):443-7. doi: 10.1111/j.1440-1827.2009.02392.x.
- 832 25. Grasemann C, Gratias S, Stephan H, Schuler A, Schramm A, Klein-Hitpass L, et  
833 al. Gains and overexpression identify DEK and E2F3 as targets of chromosome 6p  
834 gains in retinoblastoma. *Oncogene.* 2005;24(42):6441-9. Epub 2005/07/12. doi:  
835 10.1038/sj.onc.1208792.
- 836 26. Lin L, Piao J, Gao W, Piao Y, Jin G, Ma Y, et al. DEK over expression as an  
837 independent biomarker for poor prognosis in colorectal cancer. *BMC Cancer.*  
838 2013;13:366. Epub 2013/08/02. doi: 10.1186/1471-2407-13-366.
- 839 27. Datta A, Adelson ME, Mogilevkin Y, Mordechai E, Sidi AA, Trama JP.  
840 Oncoprotein DEK as a tissue and urinary biomarker for bladder cancer. *BMC*  
841 *Cancer.* 2011;11:234-. doi: 10.1186/1471-2407-11-234.
- 842 28. Kappes F, Khodadoust MS, Yu L, Kim DS, Fullen DR, Markovitz DM, et al. DEK  
843 expression in melanocytic lesions. *Hum Pathol.* 2011;42(7):932-8. Epub  
844 2011/02/15. doi: 10.1016/j.humpath.2010.10.022.
- 845 29. Riveiro-Falkenbach E, Ruano Y, Garcia-Martin RM, Lora D, Cifdaloz M,  
846 Acquadro F, et al. DEK oncogene is overexpressed during melanoma progression.

- 847 Pigment Cell Melanoma Res. 2017;30(2):194-202. Epub 2016/11/29. doi:  
848 10.1111/pcmr.12563.
- 849 30. Smith EA, Krumpelbeck EF, Jegga AG, Prell M, Matrkka MM, Kappes F, et al. The  
850 nuclear DEK interactome supports multi-functionality. *Proteins*. 2018;86(1):88-97.  
851 doi: 10.1002/prot.25411.
- 852 31. Saha AK, Kappes F, Mundade A, Deutzmann A, Rosmarin DM, Legendre M, et  
853 al. Intercellular trafficking of the nuclear oncoprotein DEK. *Proceedings of the*  
854 *National Academy of Sciences of the United States of America*. 2013;110(17):6847-  
855 52. doi: 10.1073/pnas.1220751110.
- 856 32. Wise-Draper TM, Allen HV, Jones EE, Habash KB, Matsuo H, Wells SI.  
857 Apoptosis inhibition by the human DEK oncoprotein involves interference with p53  
858 functions. *Mol Cell Biol*. 2006;26(20):7506-19.
- 859 33. Khodadoust MS, Verhaegen M, Kappes F, Riveiro-Falkenbach E, Cigudosa JC,  
860 Kim DS, et al. Melanoma proliferation and chemoresistance controlled by the DEK  
861 oncogene. *Cancer Res*. 2009;69(16):6405-13. Epub 2009/08/15.]
- 862 34. Zhou QC, Deng XF, Yang J, Jiang H, Qiao MX, Liu HH, et al. Oncogene DEK is  
863 highly expressed in lung cancerous tissues and positively regulates cell proliferation  
864 as well as invasion. *Oncol Lett*. 2018;15(6):8573-81. doi: 10.3892/ol.2018.8436.
- 865 35. Waldmann T, Eckerich C, Baack M, Gruss C. The ubiquitous chromatin protein  
866 DEK alters the structure of DNA by introducing positive supercoils. *J Biol Chem*.  
867 2002;277(28):24988-94.
- 868 36. Waldmann T, Baack M, Richter N, Gruss C. Structure-specific binding of the  
869 proto-oncogene protein DEK to DNA. *Nucleic Acids Res*. 2003;31(23):7003-10.
- 870 37. Privette Vinnedge LM, Kappes F, Nassar N, Wells SI. Stacking the DEK: from  
871 chromatin topology to cancer stem cells. *Cell cycle*. 2013;12(1):51-66. doi:  
872 10.4161/cc.23121.
- 873 38. Soares LM, Zanier K, Mackereth C, Sattler M, Valcarcel J. Intron removal  
874 requires proofreading of U2AF/3' splice site recognition by DEK. *Science*.  
875 2006;312(5782):1961-5. Epub 2006/07/01. doi: 10.1126/science.1128659.
- 876 39. Kappes F, Waldmann T, Mathew V, Yu J, Zhang L, Khodadoust MS, et al. The  
877 DEK oncoprotein is a Su(var) that is essential to heterochromatin integrity. *Genes*  
878 *& development*. 2011;25(7):673-8. Epub 2011/04/05. doi: 10.1101/gad.2036411.
- 879 40. Kavanaugh GM, Wise-Draper TM, Morreale RJ, Morrison MA, Gole B,  
880 Schwemberger S, et al. The human DEK oncogene regulates DNA damage  
881 response signaling and repair. *Nucleic Acids Res*. 2011;39(17):7465-76. doi:  
882 10.1093/nar/gkr454.
- 883 41. Smith EA, Gole B, Willis NA, Soria R, Starnes LM, Krumpelbeck EF, et al. DEK  
884 is required for homologous recombination repair of DNA breaks. *Sci Rep*.  
885 2017;7:44662. Epub 2017/03/21. doi: 10.1038/srep44662.
- 886 42. Alexiadis V, Waldmann T, Andersen J, Mann M, Knippers R, Gruss C. The  
887 protein encoded by the proto-oncogene DEK changes the topology of chromatin  
888 and reduces the efficiency of DNA replication in a chromatin-specific manner.  
889 *Genes & development*. 2000;14(11):1308-12.
- 890 43. Deutzmann A, Ganz M, Schonenberger F, Vervoorts J, Kappes F, Ferrando-May  
891 E. The human oncoprotein and chromatin architectural factor DEK counteracts DNA  
892 replication stress. *Oncogene*. 2014. doi: 10.1038/onc.2014.346.
- 893 44. Sirbu BM, Couch FB, Feigerle JT, Bhaskara S, Hiebert SW, Cortez D. Analysis  
894 of protein dynamics at active, stalled, and collapsed replication forks. *Genes &*  
895 *development*. 2011;25(12):1320-7. Epub 2011/06/21. doi: 10.1101/gad.2053211.

- 896 45. Merrick CJ, Jackson D, Diffley JFX. Visualization of Altered Replication  
897 Dynamics after DNA Damage in Human Cells. *Journal of Biological Chemistry*.  
898 2004;279(19):20067-75. doi: 10.1074/jbc.M400022200.
- 899 46. Schindelin J, Arganda-Carreras I, Frise E, Kaynig V, Longair M, Pietzsch T, et al.  
900 Fiji: an open-source platform for biological-image analysis. *Nat Meth*.  
901 2012;9(7):676-82.
- 902 47. Ball G, Demmerle J, Kaufmann R, Davis I, Dobbie IM, Schermelleh L. SIMcheck:  
903 a Toolbox for Successful Super-resolution Structured Illumination Microscopy.  
904 2015;5:15915. doi: 10.1038/srep15915.
- 905 48. Zheng L, Baumann U, Reymond JL. An efficient one-step site-directed and site-  
906 saturation mutagenesis protocol. *Nucleic Acids Res*. 2004;32(14):e115. Epub  
907 2004/08/12. doi: 10.1093/nar/gnh110.
- 908 49. Fahrner J, Kranaster R, Altmeyer M, Marx A, Burkle A. Quantitative analysis of  
909 the binding affinity of poly(ADP-ribose) to specific binding proteins as a function of  
910 chain length. *Nucleic Acids Res*. 2007;35(21):e143. Epub 2007/11/10. doi:  
911 10.1093/nar/gkm944.
- 912 50. Gill SJ, Travers J, Pshenichnaya I, Kogera FA, Barthorpe S, Mironenko T, et al.  
913 Combinations of PARP Inhibitors with Temozolomide Drive PARP1 Trapping and  
914 Apoptosis in Ewing's Sarcoma. *PLoS One*. 2015;10(10):e0140988. Epub  
915 2015/10/28. doi: 10.1371/journal.pone.0140988.
- 916 51. Velic D, Couturier AM, Ferreira MT, Rodrigue A, Poirier GG, Fleury F, et al. DNA  
917 Damage Signalling and Repair Inhibitors: The Long-Sought-After Achilles' Heel of  
918 Cancer. *Biomolecules*. 2015;5(4):3204-59. Epub 2015/11/28. doi:  
919 10.3390/biom5043204.
- 920 52. Gustafsson MG, Shao L, Carlton PM, Wang CJ, Golubovskaya IN, Cande WZ,  
921 et al. Three-dimensional resolution doubling in wide-field fluorescence microscopy  
922 by structured illumination. *Biophys J*. 2008;94(12):4957-70. doi:  
923 10.1529/biophysj.107.120345.
- 924 53. Rust MJ, Bates M, Zhuang X. Sub-diffraction-limit imaging by stochastic optical  
925 reconstruction microscopy (STORM). *Nature methods*. 2006;3(10):793-5. doi:  
926 10.1038/nmeth929.
- 927 54. Nozaki T, Imai R, Tanbo M, Nagashima R, Tamura S, Tani T, et al. Dynamic  
928 Organization of Chromatin Domains Revealed by Super-Resolution Live-Cell  
929 Imaging. *Molecular cell*. 2017;67(2):282-93 e7. doi: 10.1016/j.molcel.2017.06.018.
- 930 55. Ying S, Chen Z, Medhurst AL, Neal JA, Bao Z, Mortusewicz O, et al. DNA-PKcs  
931 and PARP1 Bind to Unresected Stalled DNA Replication Forks Where They Recruit  
932 XRCC1 to Mediate Repair. *Cancer Res*. 2016;76(5):1078-88. doi: 10.1158/0008-  
933 5472.CAN-15-0608.
- 934 56. Toledo LI, Altmeyer M, Rask MB, Lukas C, Larsen DH, Povlsen LK, et al. ATR  
935 prohibits replication catastrophe by preventing global exhaustion of RPA. *Cell*.  
936 2013;155(5):1088-103. doi: 10.1016/j.cell.2013.10.043.
- 937 57. Maréchal A, Zou L. RPA-coated single-stranded DNA as a platform for post-  
938 translational modifications in the DNA damage response. *Cell Research*.  
939 2015;25(1):9-23. doi: 10.1038/cr.2014.147.
- 940 58. Bhat KP, Cortez D. RPA and RAD51: fork reversal, fork protection, and genome  
941 stability. *Nature structural & molecular biology*. 2018;25(6):446-53. doi:  
942 10.1038/s41594-018-0075-z.



- 943 59. de Murcia G, Jongstra-Bilen J, Ittel ME, Mandel P, Delain E. Poly(ADP-ribose)  
944 polymerase auto-modification and interaction with DNA: electron microscopic  
945 visualization. *EMBO J.* 1983;2(4):543-8. Epub 1983/01/01.
- 946 60. Brazda V, Laister RC, Jagelska EB, Arrowsmith C. Cruciform structures are a  
947 common DNA feature important for regulating biological processes. *BMC Mol Biol.*  
948 2011;12:33. Epub 2011/08/06. doi: 10.1186/1471-2199-12-33.
- 949 61. Salvati E, Scarsella M, Porru M, Rizzo A, Iachettini S, Tentori L, et al. PARP1 is  
950 activated at telomeres upon G4 stabilization: possible target for telomere-based  
951 therapy. *Oncogene.* 2010;29(47):6280-93. Epub 2010/08/31. doi:  
952 10.1038/onc.2010.344.
- 953 62. Dungrawala H, Rose KL, Bhat KP, Mohni KN, Glick GG, Couch FB, et al. The  
954 Replication Checkpoint Prevents Two Types of Fork Collapse without Regulating  
955 Replisome Stability. *Molecular cell.* 2015;59(6):998-1010. doi:  
956 10.1016/j.molcel.2015.07.030.
- 957 63. Lossaint G, Larroque M, Ribeyre C, Bec N, Larroque C, Decaillet C, et al.  
958 FANCD2 binds MCM proteins and controls replisome function upon activation of s  
959 phase checkpoint signaling. *Molecular cell.* 2013;51(5):678-90. Epub 2013/09/03.  
960 doi: 10.1016/j.molcel.2013.07.023.
- 961 64. Ribeyre C, Zellweger R, Chauvin M, Bec N, Larroque C, Lopes M, et al. Nascent  
962 DNA Proteomics Reveals a Chromatin Remodeler Required for Topoisomerase I  
963 Loading at Replication Forks. *Cell Reports.* 2016;15(2):300-9.
- 964 65. Lopez-Contreras Andres J, Ruppen I, Nieto-Soler M, Murga M, Rodriguez-  
965 Acebes S, Remeseiro S, et al. A Proteomic Characterization of Factors Enriched at  
966 Nascent DNA Molecules. *Cell Reports.* 2013;3(4):1105-16.
- 967 66. Dantzer F, Santoro R. The expanding role of PARPs in the establishment and  
968 maintenance of heterochromatin. *FEBS J.* 2013;280(15):3508-18. Epub  
969 2013/06/05. doi: 10.1111/febs.12368.
- 970 67. Zhang Y, Wang J, Ding M, Yu Y. Site-specific characterization of the Asp- and  
971 Glu-ADP-ribosylated proteome. *Nature methods.* 2013;10(10):981-4. doi:  
972 10.1038/nmeth.2603.
- 973 68. Martello R, Leutert M, Jungmichel S, Bilan V, Larsen SC, Young C, et al.  
974 Proteome-wide identification of the endogenous ADP-ribosylome of mammalian  
975 cells and tissue. *Nat Commun.* 2016;7:12917. Epub 2016/10/01. doi:  
976 10.1038/ncomms12917.
- 977 69. Bonfiglio JJ, Colby T, Matic I. Mass spectrometry for serine ADP-ribosylation?  
978 Think o-glycosylation! *Nucleic Acids Res.* 2017. Epub 2017/05/19. doi:  
979 10.1093/nar/gkx446.
- 980 70. Fischbach A, Kruger A, Hampp S, Assmann G, Rank L, Hufnagel M, et al. The  
981 C-terminal domain of p53 orchestrates the interplay between non-covalent and  
982 covalent poly(ADP-ribosyl)ation of p53 by PARP1. *Nucleic Acids Res.*  
983 2018;46(2):804-22. doi: 10.1093/nar/gkx1205.
- 984 71. Illuzzi G, Fouquerel E, Ame JC, Noll A, Rehmet K, Nasheuer HP, et al. PARG is  
985 dispensable for recovery from transient replicative stress but required to prevent  
986 detrimental accumulation of poly(ADP-ribose) upon prolonged replicative stress.  
987 *Nucleic Acids Res.* 2014;42(12):7776-92. Epub 2014/06/08. doi:  
988 10.1093/nar/gku505.
- 989 72. Maya-Mendoza A, Moudry P, Merchut-Maya JM, Lee M, Strauss R, Bartek J.  
990 High speed of fork progression induces DNA replication stress and genomic  
991 instability. *Nature.* 2018;559(7713):279-84. doi: 10.1038/s41586-018-0261-5.

992 **SUPPORTING INFORMATION**

993 **S1 Table** Primer sequences for the site-directed mutagenesis of the DEK

994 primary sequence

995 **S1 Fig.** AZD-2281 but not ABT-888 induces DNA damage in U2-OS cells

996 **S2 Fig.** Absence of combined positive effect of DEK downregulation and

997 PARP1/2 inhibition on fork progression under high doses of HU

998 **S3 Fig.** HU-induced fork arrest

999 **S4 Fig.** Determination of RPA-positive cells

1000 **S5 Fig.** Mutational analysis of PBD1 and PBD3 using recombinant peptides

1001 **S6 Fig.** Reconstitution of U2-OS shDEK cells with DEK WT-GFP or DEK PBD2-

1002 Mut2-GFP

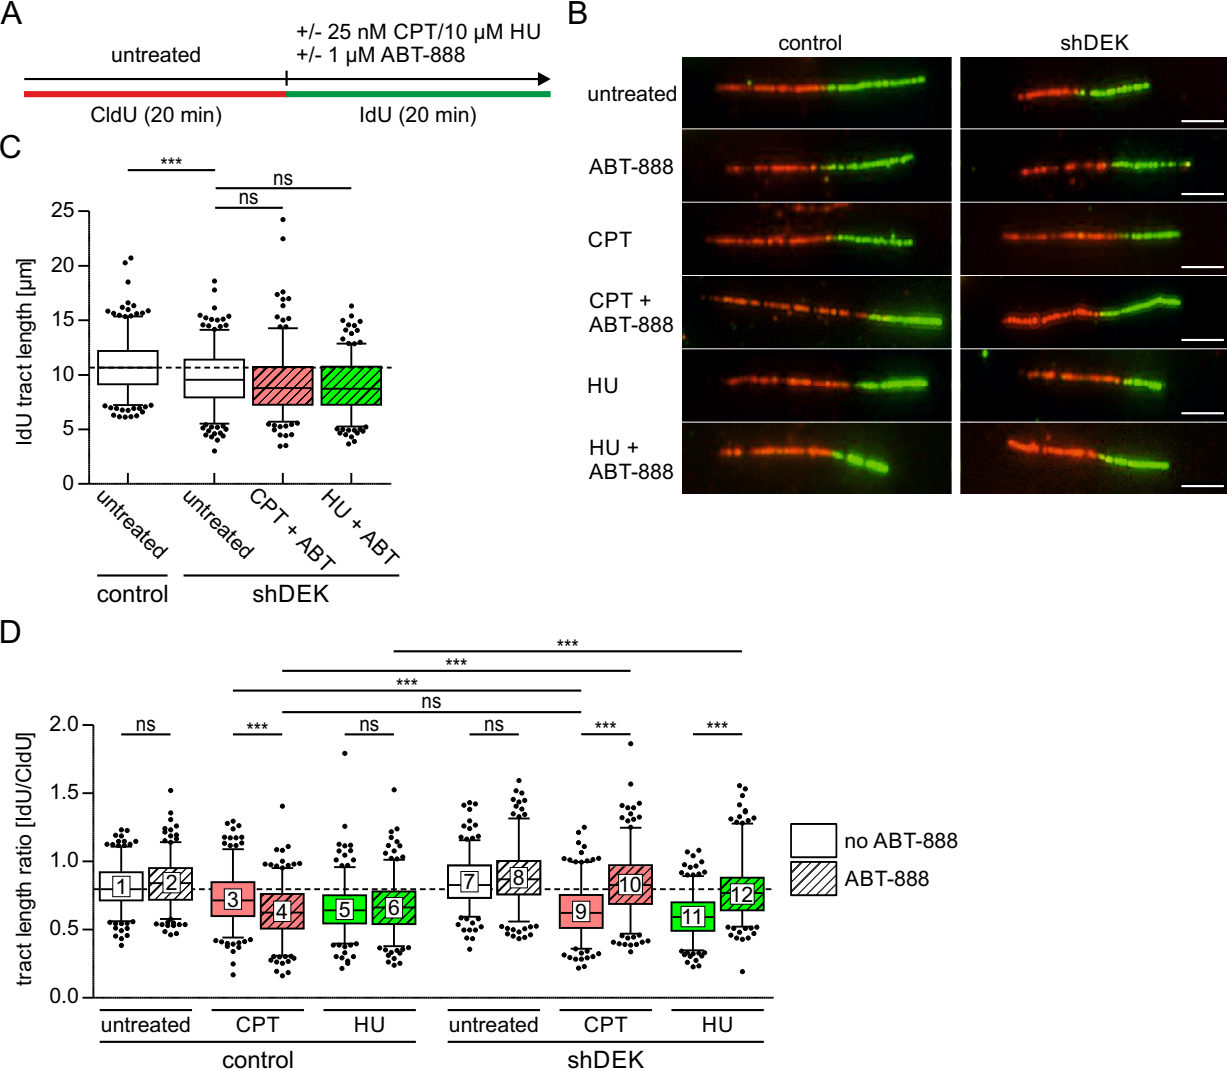

Ganz\_Vogel Fig.1

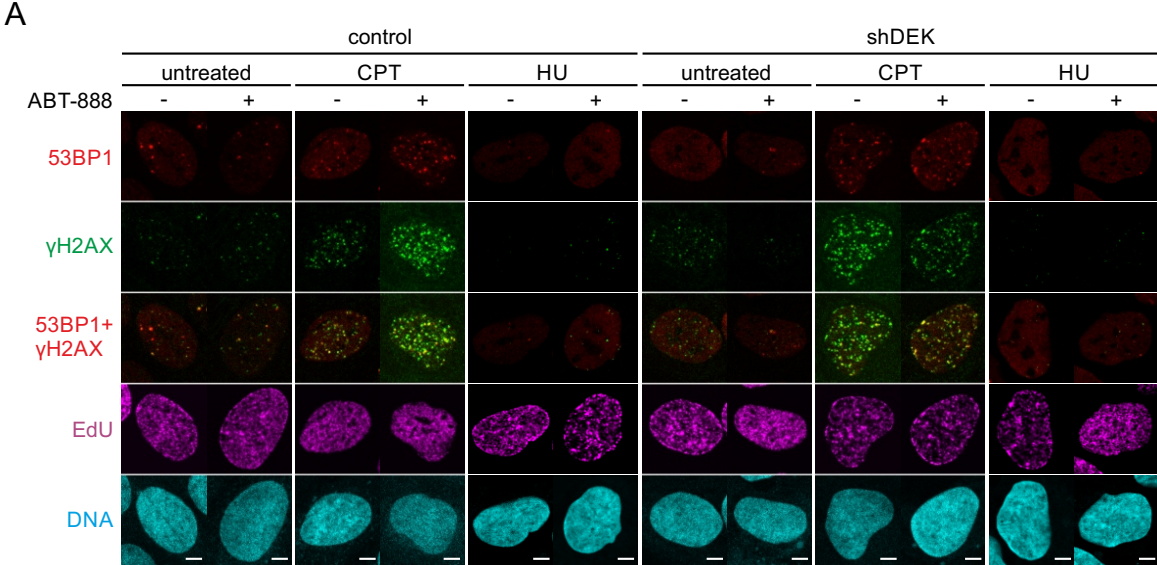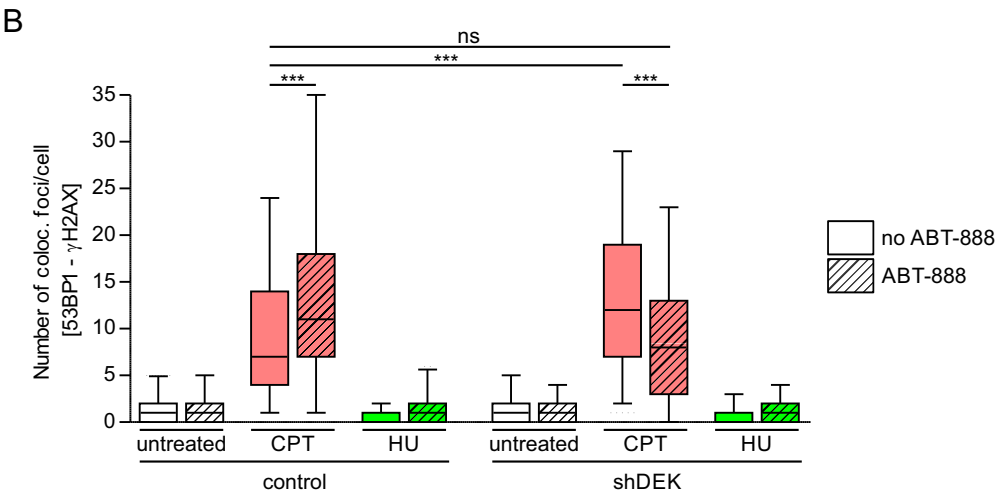

Ganz\_Vogel Fig.2



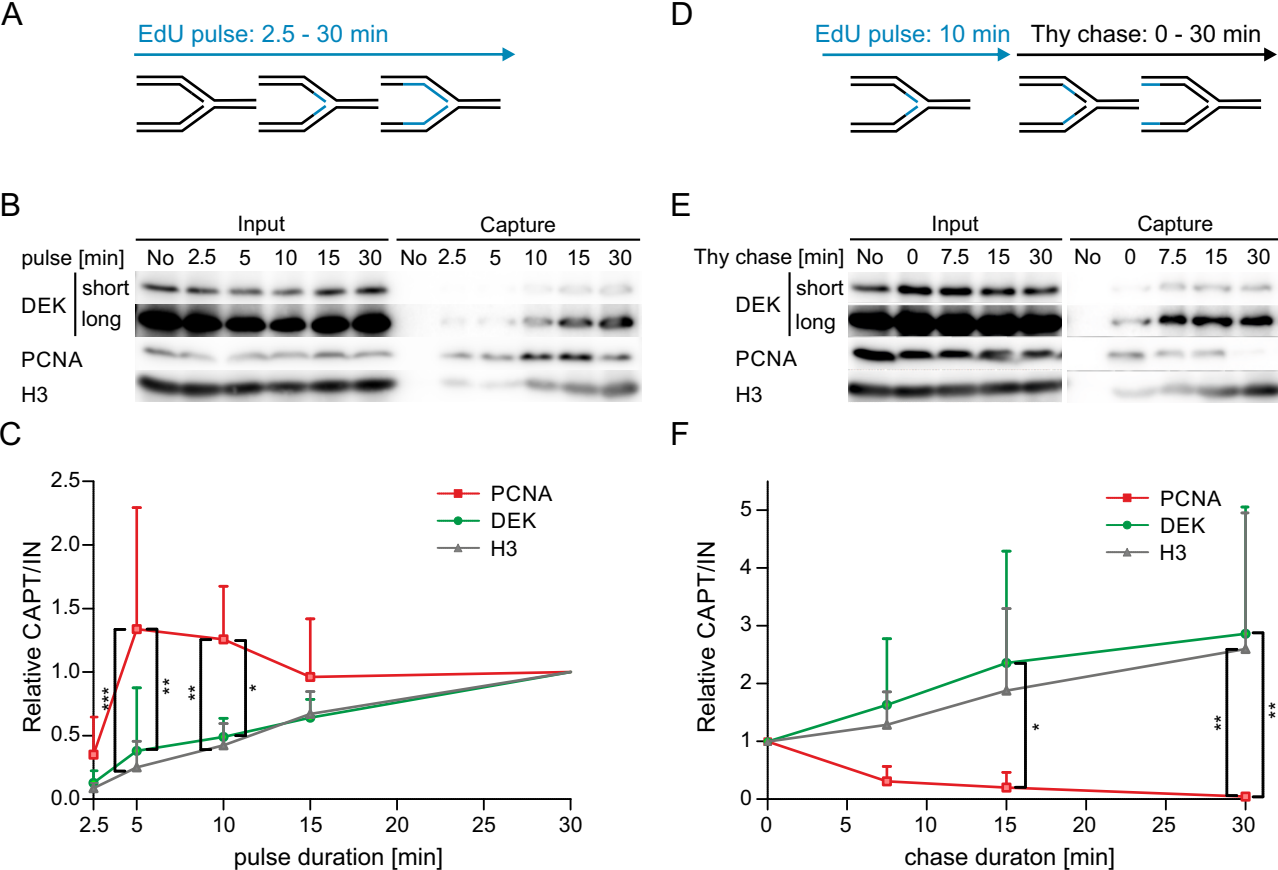

Ganz\_Vogel Fig.3

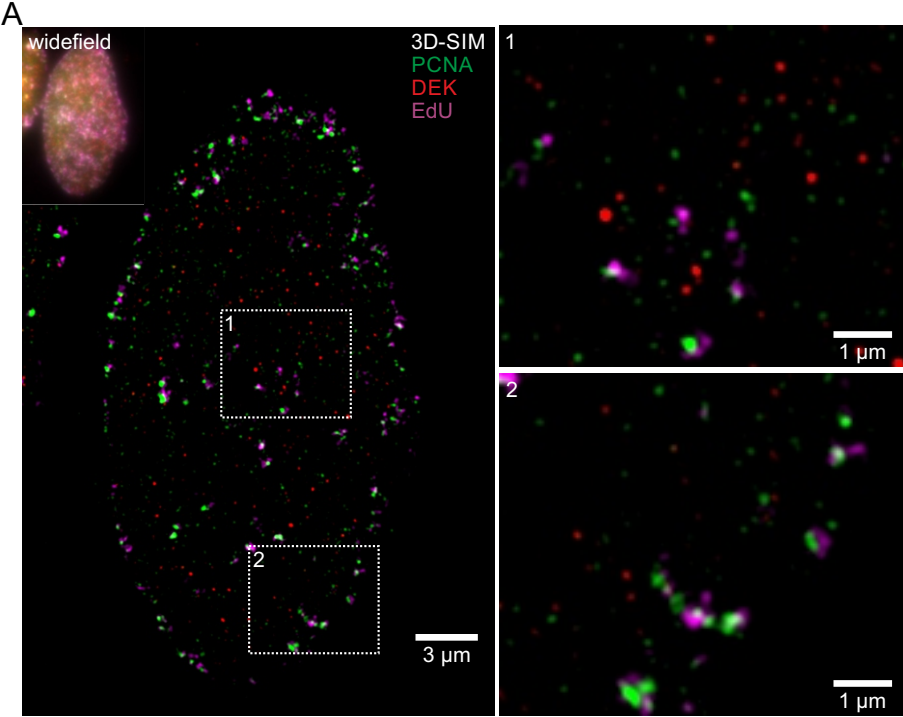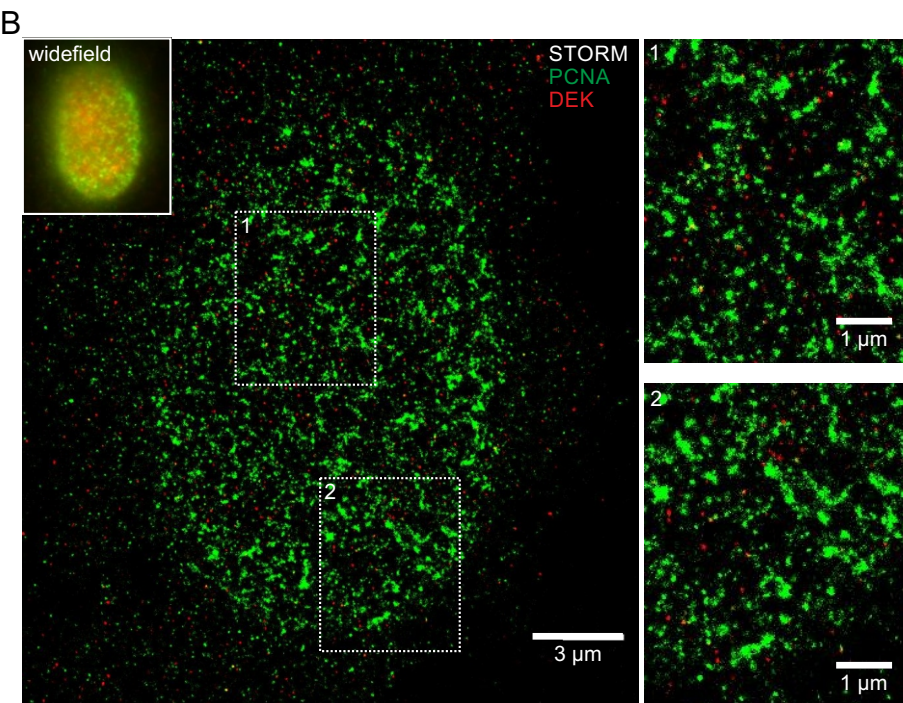

Ganz\_Vogel Fig.4

A

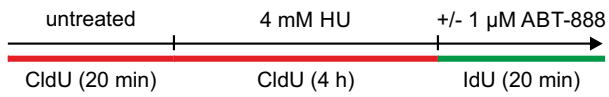

B

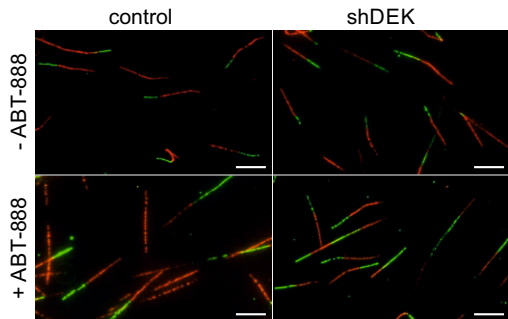

C

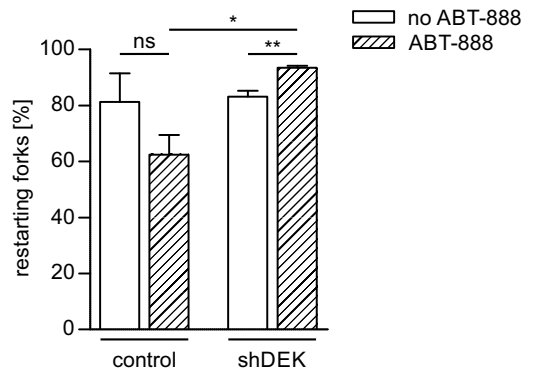

Ganz\_Vogel Fig.5

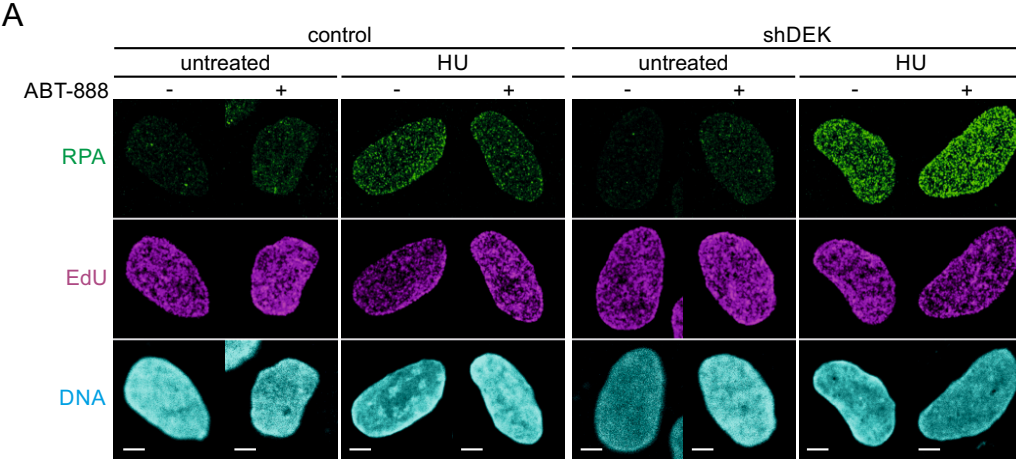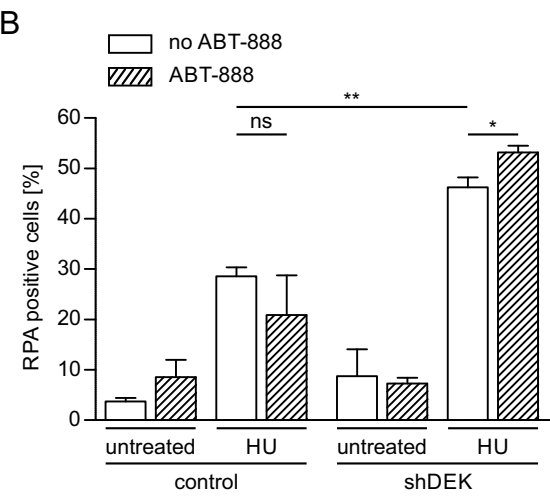

Ganz\_Vogel Fig.6

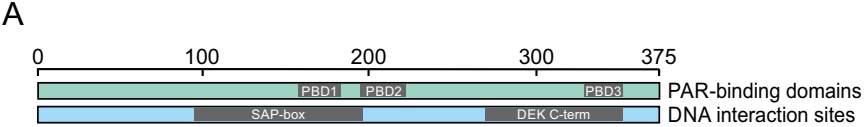

**B**

|          | PBD2    | basic stretch  | core motif     |
|----------|---------|----------------|----------------|
| DEK WT   | 195-222 | KSKKTCSTKGSKKE | RNSSGMARKAKRTK |
| DEK Mut1 | 195-222 | KSKKTCSTKGSKKE | RNSSGMAAAAATA  |
| DEK Mut2 | 195-222 | KSATCSTKGSAAE  | RNSSGMAAAAATA  |
| DEK Mut3 | 195-222 | ASKKTCSTKGSKKE | RNSSGMAAAAATA  |
| DEK Mut4 | 195-222 | KSKKTCSTKGSKKE | RNSSGAARKAKRTK |

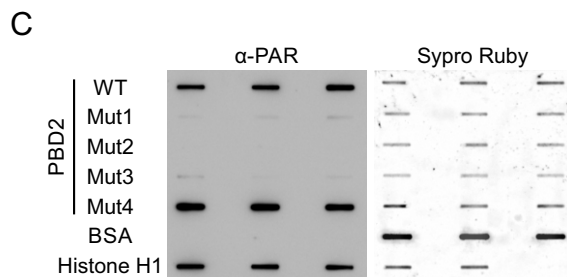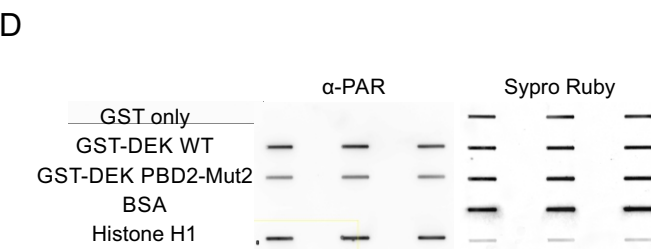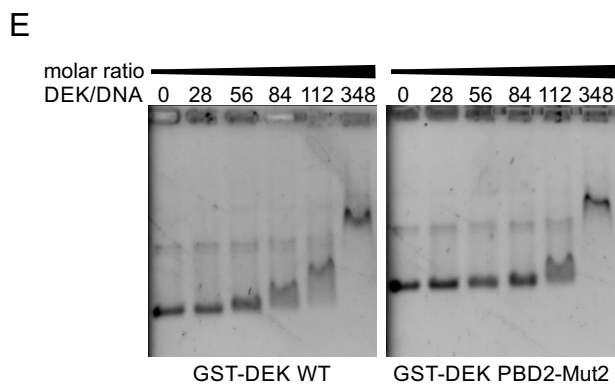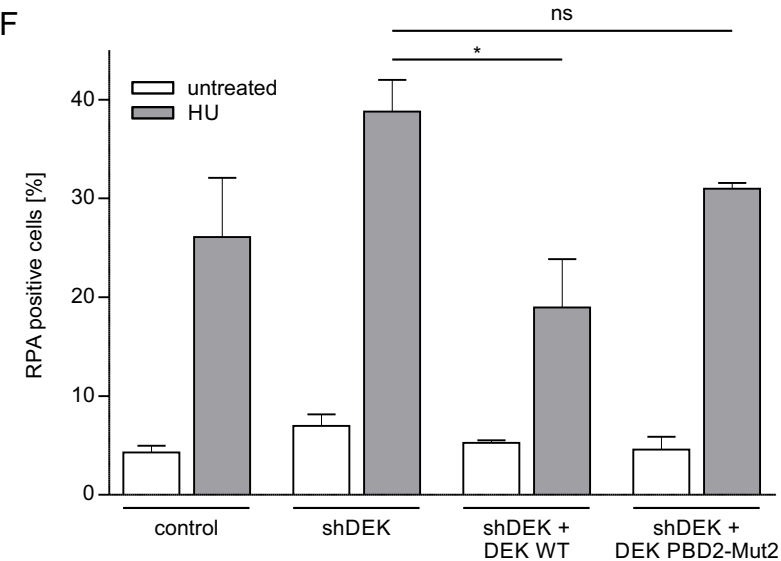

Ganz\_Vogel Fig.7
